# Supplementary material for: An intestinally secreted host factor promotes microsporidia invasion of C. elegans
Source: eLife. 2022 Jan 7;11:e72458. doi: 10.7554/eLife.72458 (PMC8806185; doi:10.7554/eLife.72458)
Supplement: Figure 1—figure supplement 1—source data 1. [file elife-72458-fig1-figsupp1-data1.xlsx]

## Sheet: S1a) 
Y axis: % Gravid					Figure 1-Figure supplement 1- Source data 1: Mapping and validation of aaim-1 as the gene associated with resistance to N. parisii.
	Figure 1-Figure supplement 1- Source data 1: Mapping and validation of aaim-1 as the gene associated with resistance to N. parisii.
	N2	fawn-1 (kea89)	fawn-2 (kea90)	fawn-3 (kea28)	fawn-4 (kea103)
R1	13	89	98	95	41
R2	5	84	89	96	44

## Sheet: S1b)
Y Axis: % of VC20019 sequence			Figure 1-Figure supplement 1- Source data 1: Mapping and validation of aaim-1 as the gene associated with resistance to N. parisii.
		Chromosome I												Chromosome 2																Chromosome 3											Chromosome 4
		1506149	2726021	3494925	5375056	6676830	7495423	8797510	9799480	11512501	13328875	14588340		15408414	16325405	16712108	17804382	18726524	19499110	20443605	21378410	22432090	23196605	24304614	25315614	26225825	27252272	28256825		31464739	33931405	34709570	35680264	36222948	37366133	37969089	39558687	41205655	42430256		45261010	46765460	47932981	48406122	49577282	50566102	51491629	52566855	53283237
N2	Selection 1	0.503305	0.46819	0.448225	0.44256	0.443701	0.464071	0.435703	0.453901	0.47734	0.460133	0.4414		0.515167	0.507353	0.470339	0.512727	0.503497	0.492207	0.497851	0.47105	0.4715	0.462562	0.450437	0.444335	0.42599	0.468481	0.510572		0.515212	0.521552	0.486408	0.530794	0.495252	0.510567	0.50569	0.470356	0.512376	0.49429		0.501654	0.488284	0.432387	0.437562	0.477558	0.449319	0.464796	0.474436	0.441648
	Selection 2	0.486356	0.508543	0.493092	0.493553	0.49354	0.517181	0.48626	0.489642	0.49639	0.454898	0.380872		0.504762	0.542017	0.4511	0.491105	0.497693	0.45554	0.482877	0.5	0.486996	0.51871	0.495641	0.48882	0.481393	0.481481	0.571111		0.553744	0.505319	0.491885	0.533283	0.498721	0.508397	0.489107	0.46734	0.482342	0.492447		0.489691	0.460775	0.414811	0.435077	0.447769	0.433589	0.455925	0.431452	0.422176
fawn-1 (kea89)	Selection 1	0.497738	0.501433	0.461244	0.44429	0.477395	0.475155	0.463625	0.448777	0.49222	0.475932	0.455008		0.489942	0.488372	0.457379	0.500317	0.538863	0.535367	0.569595	0.596367	0.566498	0.585221	0.552211	0.505919	0.518124	0.544053	0.59329		0.507492	0.53252	0.513231	0.536813	0.525064	0.501792	0.51083	0.485113	0.485533	0.530516		0.336041	0.321733	0.46274	0.499308	0.475858	0.464865	0.51216	0.471963	0.500668
	Selection 2	0.467033	0.477905	0.469369	0.442295	0.481409	0.483766	0.470833	0.469112	0.504931	0.475722	0.443163		0.502053	0.527897	0.47109	0.540888	0.584454	0.586228	0.617216	0.652808	0.644616	0.654187	0.594846	0.609626	0.557	0.560662	0.596221		0.50029	0.592771	0.560823	0.596175	0.548311	0.580872	0.562315	0.541583	0.520746	0.528596		0.319335	0.360478	0.486974	0.513889	0.511594	0.528384	0.557143	0.530238	0.49594
fawn-2 (kea90)	Selection 1	0.415434	0.396226	0.403497	0.38397	0.399068	0.378086	0.40107	0.402242	0.43784	0.388338	0.348406		0.423347	0.462791	0.378307	0.446674	0.428634	0.413476	0.431295	0.426112	0.426493	0.414188	0.424752	0.397332	0.385029	0.435666	0.404863		0.437924	0.466025	0.408075	0.45977	0.417347	0.454265	0.410636	0.363377	0.41547	0.431689		0.402817	0.421832	0.368505	0.405405	0.392367	0.41179	0.389266	0.399305	0.402091
	Selection 2	0.374013	0.372886	0.392787	0.365903	0.379988	0.377782	0.371943	0.388274	0.40131	0.383454	0.317328		0.407701	0.380353	0.352903	0.393903	0.38538	0.362727	0.381528	0.359382	0.366241	0.375572	0.363741	0.343101	0.341264	0.376253	0.366786		0.414447	0.38222	0.349469	0.395634	0.348417	0.388281	0.353333	0.32608	0.354108	0.379401		0.376017	0.372335	0.337648	0.364218	0.365184	0.370583	0.36996	0.364837	0.359691
fawn-3 (kea28)	Selection 1	0.500223	0.486715	0.512621	0.490382	0.514523	0.505506	0.512187	0.496411	0.542905	0.520484	0.495466		0.523501	0.542857	0.461107	0.492902	0.532546	0.521623	0.542825	0.522928	0.53564	0.524464	0.527138	0.509922	0.482417	0.515479	0.451596		0.510377	0.529966	0.504148	0.550888	0.51971	0.55546	0.507876	0.498858	0.52415	0.546041		0.514894	0.529892	0.503903	0.517427	0.542205	0.555684	0.548429	0.575264	0.544102
	Selection 2	0.5	0.503529	0.534091	0.535152	0.525387	0.527919	0.528835	0.53297	0.543843	0.512737	0.463805		0.498915	0.482213	0.479016	0.486785	0.530577	0.514293	0.551484	0.536904	0.531992	0.536172	0.513046	0.510306	0.477366	0.508982	0.471771		0.507501	0.532355	0.508058	0.544727	0.517629	0.546559	0.516334	0.499172	0.534784	0.545455		0.506578	0.505899	0.471556	0.511518	0.519734	0.531765	0.540881	0.542042	0.52124
[truncated: 44 more columns]

## Sheet: S1d)
Y axis: % Gravid				Figure 1-Figure supplement 1- Source data 1: Mapping and validation of aaim-1 as the gene associated with resistance to N. parisii.
	Infected
	N2	fawn-1 (kea89)	fawn-2 (kea90)	fawn-3 (kea28)	aaim-1 (ok295)
R1	0	87	99	82	83
R2	35	90	98	99	99
R3	8.5	99	97	97	95
