# Supplementary material for: An intestinally secreted host factor promotes microsporidia invasion of C. elegans
Source: eLife. 2022 Jan 7;11:e72458. doi: 10.7554/eLife.72458 (PMC8806185; doi:10.7554/eLife.72458)
Supplement: Figure 1—source data 1. [file elife-72458-fig1-data1.xlsx]

## Sheet: 1b)
Y axis : % Gravid
	Uninfected				Figure 1: Mutations in aaim-1 result in resistance to N. parisii infection.
	N2	fawn-1 (kea89)	fawn-2 (kea90)	fawn-3 (kea28)
R1	100	86	100	100
R2	98	80	100	100
R3	100	90	100	100
	Infected
	N2	fawn-1 (kea89)	fawn-2 (kea90)	fawn-3 (kea28)
R1	5.4	37	87	88
R2	2	52	66	57
R3	10	89	99	84

## Sheet: 1c)
Y axis: % Infected
					Figure 1: Mutations in aaim-1 result in resistance to N. parisii infection.
	Infected
	N2	fawn-1 (kea89)	fawn-2 (kea90)	fawn-3 (kea28)
R1	79	1.5	1	2
R2	89	15	8	20
R3	99	15	21	23

## Sheet: 1e)
Y axis: % Gravid
					Figure 1: Mutations in aaim-1 result in resistance to N. parisii infection.
	Infected
	N2	fawn-3(kea91)	aaim-1 (kea28)	aaim-1 (kea22)
R1	7.6	98	84	86
R2	2	98	85	80
R3	2.2	94	81	80
