# Supplementary material for: An intestinally secreted host factor promotes microsporidia invasion of C. elegans
Source: eLife. 2022 Jan 7;11:e72458. doi: 10.7554/eLife.72458 (PMC8806185; doi:10.7554/eLife.72458)
Supplement: Figure 2—figure supplement 2—source data 1. [file elife-72458-fig2-figsupp2-data1.xlsx]

## Sheet: S3b)
Y Axis: % Gravid				Figure 2-Figure supplement 2- Source data 1: aaim-1 is expressed in arcade cells and presence of C-terminal 3x Flag tag does not disrupt AAIM-1 function.
		Infected
		N2	aaim-1 (kea22)	aaim-1 (kea22) + paaim-1::aaim-1::unc54	aaim-1 (kea22) + paaim-1::aaim-1::3xflag::unc54	aaim-1 (kea22) + paaim-1::SP𝝙aaim-1::unc54	aaim-1 (kea22) + paaim-1::SP𝝙aaim-1::3xflag::unc54
	R1	13	95	26	21	95	84
	R2	28	93	30	31	86	90
	R3	31	91	35	34	87	87
