# Supplementary material for: An intestinally secreted host factor promotes microsporidia invasion of C. elegans
Source: eLife. 2022 Jan 7;11:e72458. doi: 10.7554/eLife.72458 (PMC8806185; doi:10.7554/eLife.72458)
Supplement: Figure 2—source data 1. [file elife-72458-fig2-data1.xlsx]

## Sheet: 2b)
Y Axis: % Gravid
		Infected
		N2	aaim-1 (kea22)	aaim-1 (kea22) + paaim-1::aaim-1::3xflag::unc54	aaim-1 (kea22) + paaim-1::SP𝝙aaim-1::3xflag::unc54	aaim-1 (kea22) + pspp-5::aaim-1::3xflag::unc54
	R1	8.4	84	13	77	23.5
	R2	9.9	90	18	83	41
	R3	14.7	93	15.4	87	25
Figure 2: AAIM-1 is secreted from intestinal cells.
