# Supplementary material for: An intestinally secreted host factor promotes microsporidia invasion of C. elegans
Source: eLife. 2022 Jan 7;11:e72458. doi: 10.7554/eLife.72458 (PMC8806185; doi:10.7554/eLife.72458)
Supplement: Figure 3—figure supplement 1—source data 1. [file elife-72458-fig3-figsupp1-data1.xlsx]

## Sheet: S4a)
Y axis: % infected
			Figure 3- Figure supplement 1- Source data 1: aaim-1 mutants do not clear N. parisii and developmentally restricted N. parisii invasion defect is not due to a feeding defect.
	Infected
	N2 3hpi	N2 24 hpi	fawn-1 (kea89) 3 hpi	fawn-1 (kea89) 24hpi	fawn-2 (kea90) 3hpi	fawn-2 (kea90) 24hpi	fawn-3 (kea28) 3hpi	fawn-3 (kea28) 24hpi
R1	99	98	76	55	60	44	87	81
R2	98	99	69	76	67	75	74	97
R3	97	96	62	45	45	35	57	66

## Sheet: S4b)
Y axis: % infected
			Figure 3- Figure supplement 1- Source data 1: aaim-1 mutants do not clear N. parisii and developmentally restricted N. parisii invasion defect is not due to a feeding defect.
	Infected
	N2 3hpi	N2 24 hpi	fawn-1 (kea89) 3 hpi	fawn-1 (kea89) 24hpi	fawn-2 (kea90) 3hpi	fawn-2 (kea90) 24hpi	fawn-3 (kea28) 3hpi	fawn-3 (kea28) 24hpi
R1	91	95	97	99	98	97	95	95
R2	98	99	98	100	98	88	95	95
R3	98	94	100	99	99	98	97	96

## Sheet: S4c)
Y axis: % Gravid
			Figure 3- Figure supplement 1- Source data 1: aaim-1 mutants do not clear N. parisii and developmentally restricted N. parisii invasion defect is not due to a feeding defect.
	Uninfected					Infected
	N2	fawn-1 (kea89)	fawn-2 (kea90)	fawn-3 (kea91)		N2	fawn-1 (kea89)	fawn-2 (kea90)	fawn-3 (kea91)
R1	100	90	100	99		1.7	55	100	83
R2	98	85	100	100		1.5	58	99	86
R3	100	92	100	100		1	79	98	80

## Sheet: S4d)
Y Axis: Feeding (% bead fluorsence)
				Figure 3- Figure supplement 1- Source data 1: aaim-1 mutants do not clear N. parisii and developmentally restricted N. parisii invasion defect is not due to a feeding defect.
	N2	eat-2 (ad465)	aaim-1(kea28)	aaim-1 (kea22)
R1	2.56	1.557	5.416	5.61
	4.301	1.393	5.318	4.501
	6.3026	0.833	6.809	5.751
	4.824	0.719	4.303	3.836
	3.102	1.977	3.033	6.007
	2.409	1.851	5.488	6.664
	6.629	2.945	5.457	3.49
	2.809	1.707	5.637	4.259
	1.852	2.377	5.618	6.996
	3.956	0.0091	5.555	1.74
	4.374	1.672	6.228	9.706
	4.521	0.753	2.131	2.06
	1.944	2.137	5.527	7.647
	7.352	1.691	2.468	4.132
	8.568	1.823	3.518	4.44
	3.119	2.31	4.29	7.1
	4.331	0.653	5.5	4.032
	7.914	1.294	3.333	3.88
	1.354	0.0063	4.962	8.647
	5.003	2.456	4.103	5.433
R2	3.622	1.34	2.07	2.105
	3.39	1.039	4.443	2.111
	4.101	0.069	0.863	4.318
	5.048	0.188	3.983	0.204
	4.856	0.701	4.101	1.073
	2.464	2.082	2.793	1.782
	2.309	1.102	0.121	6.016
	3.141	0.134	1.264	2.589
	2.811	2.5	7.211	3.01
	2.99	1.38	1.236	5.238
	1.746	1.87	4.131	1.512
	1.791	3.498	3.451	1.599
	2.04	1.273	1.107	11.305
	4.543	1.102	2.334	3.214
	1.632	0.842	2.114	6.951
	0.965	0.722	5.387	5.069
	1.737	0.065	1.605	2.779
	0.688	0.808	1.895	2.729
	3.438		3.616	3.07
	2.013
	6.731
R3	1.442	0.61	1.878	2.952
	1.787	0.484	2.14	0
	2.992	1.043	4.415	2.844
	2.822	1.295	1.918	1.917
	2.194	0.424	0.51	1.771
	0.679	0.677	3.907	1.91
	2.248	0.218	3.766	7.083
	3.562	1.262	3.197	2.056
	3.106	1.36	3.976	0.344
	3.307	0.187	5.391	1.05
	1.699	0.002	5.359	1.419
	2.005	0.832	2.095	2.007
	2.431	0.648	1.923	1.451
	4.474	1.087	4.469	3.487
	3.006	0.132	1.726	2.207
	5.097	2.443	1.33	1.991
	3.281	1.546	3.025	0
	3.951	0.905	0.273	5.255
	4.761	0.978	2.351	1.693
		0.178	0.706	3.225
		0.215		0.862
