# Supplementary material for: An intestinally secreted host factor promotes microsporidia invasion of C. elegans
Source: eLife. 2022 Jan 7;11:e72458. doi: 10.7554/eLife.72458 (PMC8806185; doi:10.7554/eLife.72458)
Supplement: Figure 3—figure supplement 2—source data 1. [file elife-72458-fig3-figsupp2-data1.xlsx]

## Sheet: S5a)
Y axis: Spores in gut
		Figure 3- Figure supplement 2- Source data 1: Invasion defects in aaim-1 only occur at the L1 stage of development and a mutation in aaim-1 does not alter the width of the intestinal lumen.
	N2	aaim-1 (kea28)	aaim-1 (kea22)
R1	13	1	2
	2	1	1
	2	1	5
	0	5	4
	2	4	4
	3	8	2
	2	3	3
	0	4	1
	4	1	1
	2	3	6
	3	4	1
	3	2	4
	5	1	7
	6	2	2
	1	4	1
	3	5	2
	1	1	4
	3	1	3
	2	1	4
	2	2	1
	1	3	1
	2		5
	1
	1
	1
	8
	1
	9
	6
	8
R2	2	6	1
	2	1	4
	5	2	1
	2	5	1
	2	5	2
	4	9	5
	2	3	7
	1	6	5
	4	5	6
	3	6	7
	0	1	4
	3	15	2
	1	3	5
	0	0	1
	3	6	4
	1	5	7
	4	4	4
	1	4	3
	2	3	2
	2	4	6
	1	9	5
	3	8
	2	2
	2
R3	1	3	4
	4	4	1
	4	4	5
	2	3	1
	2	2	3
	2	3	2
	2	3	2
	0	3	6
	6	1	4
	1	2	2
	6	3	2
	2	2	2
	3	4	1
	2	2	4
	5	1	2
	1	3	2
	3	2	1
	6	4	3
	6	4	3
	2	4	3
	4
	3

## Sheet: S5b)
Y axis: % spores fired
			Figure 3- Figure supplement 2- Source data 1: Invasion defects in aaim-1 only occur at the L1 stage of development and a mutation in aaim-1 does not alter the width of the intestinal lumen.
	N2	aaim-1 (kea28)	aaim-1 (kea22)
R1	100	100	0
	100	0	100
	100	0	60
	0	80	100
	50	100	75
	33	14	100
	100	100	60
	0	75	100
	25	100	0
	100	33	83
	100	50	75
	100	50	0
	100	0	29
	60	50	50
	100	75	0
	100	100	100
	100	0	75
	100	0	100
	100	0	50
	100	50	50
	100	100	0
	100		80
	100
	100
	0
	100
	63
	100
	78
	67
	88
R2	100	60	100
	100	100	75
	60	100	100
	50	83	100
	100	100	100
	75	100	80
	0	100	0
	100	83	100
	100	80	83
	66	100	30
	0	100	0
	66	30	40
	100	100	20
	75	50	100
	0	20	50
	50	0	0
	100	100	0
	66	75	100
	50	50	50
	100	55	66
		50	60
		50
R3	100	90	67
	75	78	48
	83	60	74
	74	78	79
	100	59	78
	60	100	85
	80	90	81
	70	63	78
	100	83	90
	72	68	60
	89	69	100
	80	23	90
	70	80	55
	42	45	50
	70	65	58

## Sheet: S5c)
Y axis: Sporoplasms			Figure 3- Figure supplement 2- Source data 1: Invasion defects in aaim-1 only occur at the L1 stage of development and a mutation in aaim-1 does not alter the width of the intestinal lumen.
	N2	aaim-1 (kea28)	aaim-1 (kea22)
R1	33	5	4
	20	8	4
	8	5	12
	12	3	1
	10	4	3
	27	5	9
	13	0	3
	17	8	4
	17	4	5
	23	7	14
	12	7	9
	24	11	4
	12	11	4
	26	3	6
	16	2	3
	18	3	5
	21	5	18
	14	7	11
	22	14	9
	15	8	7
	16	7	8
	23	1	13
	23	4	6
	14	7	13
	14	1	6
	17	7	4
			5
			8
R2	12	8	6
	11	4	0
	17	2	7
	13	3	1
	13	6	2
	14	4	3
	15	3	2
	11	13	3
	21	9	3
	13	12	4
	11	1	1
	23	1	1
	13	7	0
	14	9	3
	16	5	3
	8	1	7
	13	3	2
	12	6	4
	18	3	8
	6	3	11
	17	9	3
	6	3	9
	13	5	6
	20	7	0
	11	8	1
R3	21	4	8
	23	4	9
	7	13	3
	21	3	12
	13	2	12
	15	6	5
	16	4	2
	11	5	3
	14	7	3
	15	14	3
	20	7	7
	10	2	21
	11	11	6
	8	8	9
	2	1	6
	16	9	3
	28	3	3
	18	5	2
	21	7	6
	8	4	4
	14	5	5
	19	1	2
	14	5	7
	18	8	2
	13	4	11
	14	5	7

## Sheet: S5d)
Y axis: Spores in gut			Figure 3- Figure supplement 2- Source data 1: Invasion defects in aaim-1 only occur at the L1 stage of development and a mutation in aaim-1 does not alter the width of the intestinal lumen.
	N2	aaim-1 (kea28)	aaim-1 (kea22)
R1	6	0	0
	0	0	0
	8	0	14
	8	8	2
	0	0	3
	1	100	12
	0	0	8
	5	24	0
	8	34	0
	26	20	0
	1	9	11
	4	0	0
	7	69	0
	6	38	0
	15	23	0
	8	0	0
	0	1	20
	13	0	0
	16	0	0
	5	29	0
	10	44	6
	0	7	3
	2	10	0
	0	1	0
	4	1	0
R2	0	0	0
	3	8	0
	14	35	0
	1	9	4
	16	0	0
	2	0	0
	0	0	15
	6	0	0
	6	0	4
	0	0	6
	0	7	6
	0	0	25
	5	0	4
	0	0	0
	8	0	0
	0	5	21
	0	0	0
	1	0	3
	3	0	0
	0	4	0
	1	0	10
	0	0	0
	0	0	13
	4	0	3
	12	0	0
R3	2	23	52
	10	32	21
	12	9	19
	27	32	19
	2	17	20
	45	3	20
	25	30	16
	9	7	26
	30	12	10
	29	0	6
	19	31	3
	5	0	37
	10	29	20
	12	13	6
	9	10	41

## Sheet: S5e)
Y axis: % spores fired			Figure 3- Figure supplement 2- Source data 1: Invasion defects in aaim-1 only occur at the L1 stage of development and a mutation in aaim-1 does not alter the width of the intestinal lumen.
	N2	aaim-1 (kea28)	aaim-1 (kea22)
R1	83	0	0
	0	0	0
	100	0	71
	74	75	100
	0	0	100
	0	100	75
	0	0	75
	100	84	0
	100	71	0
	85	85	0
	0	100	91
	100	0	0
	100	100	0
	83	82	0
	93	87	0
	100	0	0
	0	100	75
	94	0	0
	80	33	0
	70	75	0
	0	90	100
	50	85	100
	0	50	0
	100	100	0
		100	0
R2	0	0	0
	100	87.5	0
	93	85.71	0
	100	0	100
	68	0	0
	100	0	0
	0	0	60
	83	0	0
	100	0	0
	0	100	75
	0	0	100
	0	0	100
	100	0	100
	0	0	50
	50	80	0
	0	0	0
	0	0	85.71
	100	0	0
	66	4	100
	0	0	0
	0	0	0
	0	0	80
	0	0	0
	100	0	77
	83	0	100
R3	100	86.97	73
	75	78	47.62
	83.33	66	73.68
	74	78	79
	100	59	50
	66.66	100	85
	80	90	81.25
	77.77	71	57.7
	100	83	90
	100	0	57
	72	67	100
	89	0	54.05
	80	69	55
	70	23.077	16.67
	41.6	80	58.53
	66		0
	0

## Sheet: S5f)
Y axis: Sporoplasms			Figure 3- Figure supplement 2- Source data 1: Invasion defects in aaim-1 only occur at the L1 stage of development and a mutation in aaim-1 does not alter the width of the intestinal lumen.
	N2	aaim-1 (kea28)	aaim-1 (kea22)
R1	29	50	40
	42	52	50
	34	50	43
	40	55	33
	50	60	40
	56	50	3
	70	37	55
	50	45	52
	42	75	45
	21	45	40
	42	61	29
	65	80	45
	55	55	14
	70	100	47
	65	60	36
	9	90	33
	37	40	33
	11	48	25
	46	65	39
	36	21	23
	45	26	40
	26	55	22
	13	40	26
	30	50	45
	13	40	45
R2	32	10	40
	28	39	26
	50	22	30
	25	33	36
	70	28	25
	33	40	32
	21	26	45
	60	16	35
	38	20	25
	32	30	40
	31	20	50
	41	25	45
	25	30	50
	32	42	41
	32	28	23
	33	40	39
	45	29	5
	38	32	52
	60	21	55
	49	6	45
	18	14	50
	38	32	45
	32	27	40
	36	13	45
	36	3	28
	41
R3	22	40	63
	45	30	17
	30	20	21
	35	25	16
	30	45	52
	100	40	27
	55	37	54
	13	48	43
	35	32	26
	20	29	8
	25	31	21
	80	32	20
	40	57	57
	13	17	16
	18	43	73

## Sheet: S5g)
Y axis: Lumen width (µm)				Figure 3- Figure supplement 2- Source data 1: Invasion defects in aaim-1 only occur at the L1 stage of development and a mutation in aaim-1 does not alter the width of the intestinal lumen.
	N2	aaim-1 (kea22)
R1	0.568	0.681
	0.727	0.591
	0.718	0.807
	1.022	0.511
	0.915	0.482
	0.738	0.727
	0.535	0.568
	0.647	0.936
	0.614	0.642
	0.416	1.022
	0.886	0.642
	0.468	0.936
	0.681	0.482
	0.826	0.579
	0.611	0.662
	0.568	0.818
	0.794	0.864
	0.683	0.818
	0.511	1.071
	0.508	0.409
	0.647	0.761
	0.395	0.568
	0.738	0.826
	0.738	0.761
	0.579	0.542
	0.562	0.381
	0.492	0.803
	0.624	0.681
	0.664	0.69
	0.559	0.681
		0.738
R2	0.423	0.718
	0.403	0.579
	0.378	0.57
	0.38	0.559
	0.369	0.73
	0.397	0.523
	1.071	0.788
	0.568	0.761
	0.727	0.993
	0.727	0.738
	0.568	0.881
	0.357	0.686
	0.783	0.803
	0.456	0.803
	0.573	0.526
	0.511	0.538
	0.702	0.592
	0.897	0.305
	0.651	0.332
	0.97	0.275
	0.738	0.227
	0.482	0.669
	0.662	0.39
	0.69	0.331
	0.584	0.321
	0.559	0.454
	0.401	0.598
	0.646	0.458
	0.527	0.611
		0.338
R3	0.359	0.568
	0.397	0.454
	0.443	0.454
	0.345	0.503
	0.397	0.321
	0.409	0.624
	0.378	0.57
	0.284	0.681
	0.508	0.323
	0.568	0.508
	0.458	0.655
	0.401	0.341
	0.523	0.341
	0.321	0.382
	0.908	0.568
	0.341	0.647
	0.664	0.402
	0.381	0.363
	0.416	0.579
	0.341	0.746
	0.482	0.523
	0.305
	0.359
	0.284
	0.458

## Sheet: S5h)
Y axis: Lumen width (µm)					Figure 3- Figure supplement 2- Source data 1: Invasion defects in aaim-1 only occur at the L1 stage of development and a mutation in aaim-1 does not alter the width of the intestinal lumen.
	N2	aaim-1 (kea22)
R1	0.38	1.684
	0.37	1.675
	0.312	0.851
	1.204	1.161
	1.053	1.653
	1.237	0.803
	0.669	0.775
	0.751	1.648
	1.023	1.102
	1.09	1.371
	0.751	1.392
	0.908	1.306
	0.976	1.845
	0.765	1.028
	1.396	0.931
	1.246	1.328
	1.218	1.192
	1.135	0.776
	1.185	0.999
	1.166	1.287
	1.346	1.182
	1.382	1.046
	1.077	1.039
	0.87	1.305
	0.568	1.135
	1.488	1.207
	0.915	1.284
	0.945	1.605
	1.256	1.022
	0.864	1.064
R2	1.363	1.345
	1.589	0.97
	1.553	1.294
	1.548	1.113
	1.476	1.514
	1.367	1.544
	0.908	1.118
	1.498	0.963
	1.566	0.889
	1.124	1.036
	1.015	1.914
	1.493	1.578
	2.056	1.248
	0.966	0.915
	1.141	1.071
	1.473	1.436
		0.908
		0.803
		0.971
		0.582
		1.343
		1.483
		0.851
		0.911
		0.722
		1.083
R3	1.269	1.542
	1.284	1.192
	1.687	1.83
	1.269	1.251
	1.48	1.157
	1.118	1.886
	1.118	1.605
	1.277	1.706
	1.246	1.294
	1.077	1.371
	1.707	1.193
	0.971	1.126
	1.239	1.007
	1.362	1.472
	1.657	1.102
	1.472	1.367
	1.638	1.324
	1.257	1.476
	1.627	0.844
	1.036	1.373
	0.851	0.826
	1.589	1.659
	1.422	1.231
	1.402	1.406
	0.864	1.168
	1.429	1.305
	1.42	1.285
	1.939	2.011
	1.381	1.404
	1.706	1.041
