# Supplementary material for: An intestinally secreted host factor promotes microsporidia invasion of C. elegans
Source: eLife. 2022 Jan 7;11:e72458. doi: 10.7554/eLife.72458 (PMC8806185; doi:10.7554/eLife.72458)
Supplement: Figure 3—source data 1. [file elife-72458-fig3-data1.xlsx]

## Sheet: 3a)
				Figure 3: aaim-1 mutants are resistant to microsporidia at the earliest larval stage due to spore misfiring.
Y Axis: % Gravid
		Uninfected					Infected
		N2	fawn-1 (kea89)	fawn-2 (kea90)	fawn-3 (kea28)		N2	fawn-1 (kea89)	fawn-2 (kea90)	fawn-3 (kea28)
	R1	100	86	100	100		25	45	69	83
	R2	98	80	100	100		12	29	66	54
	R3	100	90	100	100		14	62	68	74

## Sheet: 3b)
				Figure 3: aaim-1 mutants are resistant to microsporidia at the earliest larval stage due to spore misfiring.
Y Axis: % Gravid
		Uninfected					Infected
		N2	fawn-1 (kea89)	fawn-2 (kea90)	fawn-3 (kea28)		N2	fawn-1 (kea89)	fawn-2 (kea90)	fawn-3 (kea28)
	R1	100	87	100	100		0.5	0	0.6	0
	R2	99	95	100	100		0	0	0	0
	R3	100	86	98	99		5	0	9	11

## Sheet: 3c)
Y axis: Spores in gut						Figure 3: aaim-1 mutants are resistant to microsporidia at the earliest larval stage due to spore misfiring.
	N2	aaim-1 (kea28)	aaim-1 (kea22)
R1	7	3	4
	4	4	4
	4	2	3
	6	2	4
	3	8	9
	7	15	5
	12	5	11
	5	4	8
	1	9	5
	2	3	5
	6	7	5
	6	9	4
	4	3	6
	9	0	6
	4	6	4
	4	0	4
	3	6	6
	4	10	9
	11	2	5
	2	9	13
	3	5	2
	5	0	8
	4	2	3
	6	4	3
	1	5	4
	6	2	11
R2	5	4	2
	11	4	1
	5	0	5
	10	2	7
	7	4	3
	7	6	2
	10	2	6
	4	1	2
	2	3	2
	16	1	3
	7	3	3
	7	4	5
	11	6	4
	4	1	4
	11	1	2
	3	1	8
	5	2	3
	6	4	1
	5	4	2
	11	2	2
	3	1	4
	4	1	7
	10	5	9
	5	9	2
	4	10	1
	16	13	3
	11	6	9
	8	1	3
	3	5	11
	1	4	2
	8	4	4
	0	3	17
	2	9	10
	2	5	5
	7	13	5
	2	3	6
	10	5	1
	8	10	9
	16	5	8
	20	3	15
	4	2	6
	17	12	10
	5	18	5
	5	11	3
	12	5	3
	11	20	9
	10	1	7
	13	18	9
	8	13	9
	2	8	5

## Sheet: 3d)
Y axis: % Fired spores						Figure 3: aaim-1 mutants are resistant to microsporidia at the earliest larval stage due to spore misfiring.
	N2	aaim-1 (kea28)	aaim-1 (kea22)
R1	60	100	0
	54	100	100
	80	0	100
	70	50	100
	100	100	0
	100	100	100
	50	50	67
	100	0	100
	0	100	100
	60	0	100
	85	100	100
	85	100	100
	91	0	100
	100	0
	55	0	0
	100	50	75
	40	75	100
	80	100	100
	100	100	100
	90	100	50
	66	60	75
	76	89	71
	70	90	100
	100	100	100
	100		0
R2	75	77	100
	63	100	66
	50	100	0
	100	40	100
	100	100	100
	75	100	100
	0	100	71
	100	70	80
	50	20	40
	100	92	100
	50	100	66
	90	40	100
	50	90	100
	75	40	38
	70	66	73
	50	100	100
	82	60	100
	80	72	80
	100	81	66
	83	80	100
	54	50	29
	60	100	70
	75	80	20
	63	23	100
	100	38
R3	23	100	0
	0	83	100
	80	66	100
	92	100	0
	100	0	100
	75	100	100
	83	100	33
	100	100	100
	80	100	50
	50	0	100
	71	0	86
	33	100	50
	14	50	0
	66	60	100
	50	0	0
	100	66	50
	100	100	63
	50	100	100
	100	100	66
	70	100	63
	100	100	100
	83	75	100
	100	100	66
	100	100	100
	100	100	100

## Sheet: 3e)
Y Axis: Sporoplasms						Figure 3: aaim-1 mutants are resistant to microsporidia at the earliest larval stage due to spore misfiring.
	N2	aaim-1 (kea28)	aaim-1 (kea22)
R1	5	2	2
	4	4	3
	3	0	1
	9	2	0
	6	3	2
	10	0	1
	10	1	0
	19	0	5
	12	1	0
	15	2	0
	6	1	0
	11	1	4
	7	3	0
	3	2	0
	3	0	1
	4	1	7
	8	0	6
	1	5	0
	7	0	2
	10	1	5
	5	0	2
	18	1	2
	7	3	0
	5	0	2
	7	1	0
R2	3	4	0
	9	4	2
	5	2	2
	4	0	2
	8	0	1
	3	0	0
	7	1	4
	6	1	1
	5	2	2
	6	0	0
	5	0	0
	5	0	0
	8	2	1
	6	0	3
	6	1	0
	5	0	0
	5	0	0
	6	8	1
	6	4	2
	9	0	1
	5	0	1
	7	0	5
	4	1	3
	8	7	0
	5	2	3
R3	13	0	0
	4	1	0
	4	2	1
	1	2	0
	4	0	0
	9	0	0
	3	1	1
	6	0	2
	4	0	3
	5	5	0
	6	0	6
	7	1	2
	7	2	0
	8	0	3
	12	6	1
	0	1	0
	16	1	0
	6	3	2
	5	5	1
	7	1	0
	7	0	1
	15	2	0
	11	0	0
	10	1	0
	4	1	1

## Sheet: 3f)
Y axis: Spores in gut						Figure 3: aaim-1 mutants are resistant to microsporidia at the earliest larval stage due to spore misfiring.
	N2	aaim-1 (kea28)	aaim-1 (kea22)
R1	2	2	1
	1	0	1
	1	0	2
	2	1	1
	0	4	3
	5	0	0
	3	0	0
	3	1	0
	2	1	3
	0	0	0
	7	0	1
	1	3	0
	1	1	0
	1	2	0
	1	0	0
	1	1	0
	1	1	3
	0	0	2
	1	1	0
	2	2	0
	0	1	1
	2	1	0
	2	0	0
	0	1	0
	0	0	1
R2	10	0	5
	2	0	5
	2	4	8
	1	0	0
	4	4	5
	9	5	4
	3	1	5
	2	7	6
	14	0	3
	4	9	7
	0	8	6
	1	12	5
	1	4	6
	1	2	24
	2	38	14
	9	2	1
	4	4	4
	5	3	4
	3	3	7
	4	10	6
	1	11	5
	4	4	8
	2	10	4
	5	8	5
	6	4	4
R3	0	18	50
	3	7	35
	6	0	40
	2	30	5
	0	10	10
	25	0	8
	0	11	2
	10	20	25
	7	40	0
	12	0	15
	3	13	10
	40	0	4
	0	28	7
	13		3
	13		5
	1

## Sheet: 3g)
Y axis: % Fired spores						Figure 3: aaim-1 mutants are resistant to microsporidia at the earliest larval stage due to spore misfiring.
	N2	aaim-1 (kea28)	aaim-1 (kea22)
R1	50	100	100
	0	0	100
	100	0	50
	50	100	50
	0	100	100
	40	0	0
	66	0	0
	100	50	0
	100	33	100
	0	0	0
	71	100	100
	100	0	0
	0	0	0
	0	100	0
	100	100	0
	100	100	0
	100	0	66
	0	0	100
	100	100	0
	100	0	0
	0	0	100
	100	100	0
	50	100	0
	0	100	0
	0	0	0
		0	100
R2	100	0	60
	100	0	75
	100	100	63
	100	0	0
	100	100	100
	77	80	80
	100	100	83
	100	75	66
	80	0	85.7
	100	88	83
	0	87	60
	100	66	66
	100	100	100
	100	100	93
	100	76	100
	77	100	75
	100	75	100
	80	100	85
	100	0	50
	100	80	100
	100	54	63
	100	100	100
	100	0	100
	80	87	100
	86	75
R3	0	16.7	70
	100	100	57
	83	0	75
	100	66	80
	0	100	80
	60	0	87.5
	0	73	100
	90	50	80
	100	75	0
	83.33	0	66
	100	77	80
	75	0	100
	0	71.43	86
	77	60	100
	61.53	85	100
	100	70

## Sheet: 3h)
Y axis: Sporoplasms						Figure 3: aaim-1 mutants are resistant to microsporidia at the earliest larval stage due to spore misfiring.
	N2	aaim-1 (kea28)	aaim-1 (kea22)
R1	1	3	3
	0	0	2
	3	3	3
	4	2	1
	2	0	3
	2	3	2
	3	4	1
	3	1	3
	2	1	5
	2	3	8
	6	0	1
	2	6	3
	2	7	2
	0	4	4
	3	1	1
	3	0	3
	6	3	0
	5	1	1
	2	1	4
	2	1	3
	5	4	2
	4	5	4
	1	3	2
	3	1	0
	2	2	2
R2	13	11	15
	11	0	12
	10	12	27
	5	0	14
	16	21	10
	8	15	11
	15	9	10
	6	8	12
	10	9	12
	17	13	10
	10	14	10
	13	10	11
	15	21	20
	7	9	21
	9	13	19
	17	6	14
	16	14	14
	17	10	11
	16	3	22
	17	10	9
	8	13	17
	15	10	13
	9	10	9
	17	10	0
	8	9	14
R3	17	19	30
	10	21	25
	12	0	35
	10	35	6
	4	10	20
	20	24	12
	0	28	25
	9	18	35
	16	40	20
	20	25	25
	0	20	16
	25	13	19
	0	30	15
	12		8
	21		15
	10
