# Supplementary material for: An intestinally secreted host factor promotes microsporidia invasion of C. elegans
Source: eLife. 2022 Jan 7;11:e72458. doi: 10.7554/eLife.72458 (PMC8806185; doi:10.7554/eLife.72458)
Supplement: Figure 4—source data 1. [file elife-72458-fig4-data1.xlsx]

## Sheet: 4b)
Y axis: % Angled spores
					Figure 4: Spores in aaim-1 mutants display improper orientation and distance to the apical intestinal membrane.
	N2	aaim-1 (kea22)
R1	31	14.8
R2	31.25	12.5
R3	35	15.8

## Sheet: 4c)
Y axis: Distance (µm)
					Figure 4: Spores in aaim-1 mutants display improper orientation and distance to the apical intestinal membrane.
	N2	aaim-1 (kea22)
R1	0.402	0.127
	0.295	0.254
	0.441	0.214
	0.229	0.273
	0.485	0.204
	0.493	0.17
	0.331	0.295
	0.332	0.242
	0.579	0.295
	0.305	0.284
	0.738	0.205
	0.114	0.205
	0.085	0.173
	0.284	0.351
	0.284	0.182
	0.345	0.182
	0.227	0.169
	0.127	0.136
	0.114	0.242
	0.381	0.161
	0.234	0.204
	0.165	0.205
	0.241	0.12
	0.458	0.148
	0.458	0.246
	0.114	0.229
	0.454	0.351
	0.254	0.229
	0.234	0.284
	0.359	0.242
	0.322	0.229
	0.401	0.23
	0.179	0.173
	0.165	0.488
	0.611	0.363
	0.359	0.244
	0.359	0.187
	0.395	0.199
	0.341	0.17
	0.653	0.221
	0.229	0.351
		0.317
		0.265
R2	0.306	0.357
	0.295	0.409
	0.163	0.296
	0.386	0.772
	0.244	0.522
	0.229	0.426
	0.423	0.345
	0.508	0.289
	0.363	0.341
	0.576	0.189
	0.456	0.189
	0.682	0.331
	0.303	0.345
	0.341	0.511
	0.38	0.39
	0.324	0.173
	0.535	0.57
	0.523	0.234
	0.74	0.268
	0.373	0.182
	0.341	0.468
	0.431	0.254
	0.179	0.624
	0.227	0.324
	0.341	0.407
	0.402	0.508
	0.363	0.136
	0.12	0.189
	0.511	0.273
	0.284	0.127
	0.254	0.227
	0.209	0.161
	0.343	0.321
	0.303	0.341
	0.325	0.199
	0.169	0.363
	0.221	0.349
	0.394	0.794
	0.482	0.151
	0.273
	0.349
	0.492
	0.423
	0.312
	0.342
R3	0.303	0.306
	0.409	0.38
	0.345	0.265
	0.268	0.413
	0.331	0.179
	0.161	0.363
	0.341	0.151
	0.611	0.363
	0.359	0.523
	0.468	0.09
	0.242	0.234
	0.142	0.359
	0.269	0.265
	0.409	0.193
	0.457	0.305
	0.357	0.321
	0.514	0.864
	0.239	0.284
	0.305	0.165
	0.204	0.08
	0.432	0.193
	0.397	0.313
	0.53	0.432
	0.23	0.281
	0.378	0.422
	0.642	0.325
	0.305	0.307
	0.359
	0.423
	0.239
	0.341
	0.151
	0.496
	0.341
	0.341
	0.193
	0.254
	0.402
	0.234
	0.273
	0.323

## Sheet: 4d)
Y axis: % Angled spores
					Figure 4: Spores in aaim-1 mutants display improper orientation and distance to the apical intestinal membrane.
	N2	aaim-1 (kea22)
R1	8.8	9
R2	12	12.6
R3	11.2	13.8

## Sheet: 4e)
Y axis: Distance (µm)
					Figure 4: Spores in aaim-1 mutants display improper orientation and distance to the apical intestinal membrane.
	N2	aaim-1(kea22)
R1	0.535	0.74
	0.268	0.397
	0.485	0.523
	0.711	0.401
	0.241	0.559
	0.426	0.359
	0.535	0.485
	0.349	0.381
	0.662	0.413
	0.39	0.401
	0.343	0.401
	0.359	0.345
	0.349	0.523
	0.39	0.381
	0.397	0.403
	0.413	0.458
	0.568	0.458
	0.568	0.458
	0.568	0.321
	0.254	0.568
	0.534	0.289
	0.457	0.239
	0.395	0.268
	0.54	0.23
	0.229	0.373
	0.407	0.221
	0.431	0.325
	0.423	0.39
	0.395	0.169
	0.269	0.375
	0.406	0.156
	0.592	0.23
	0.338	0.305
R2	0.343	0.359
	0.288	0.508
	0.295	0.458
	0.338	0.559
	0.284	0.38
	0.325	0.493
	0.256	0.269
	0.095	0.189
	0.114	0.535
	0.165	0.568
	0.165	0.349
	0.165	0.349
	0.227	0.508
	0.246	0.422
	0.204	0.361
	0.416	0.462
	0.456	0.349
	0.313	0.221
	0.284	0.295
	0.227	0.221
	0.165	0.254
	0.254	0.287
	0.262	0.419
	0.388	0.462
	0.415	0.284
	0.378	0.247
	0.468	0.229
	0.611	0.458
	0.409	0.522
	0.263	0.443
	0.273
	0.46
	0.373
R3	0.373	0.458
	0.359	0.254
	0.23	0.488
	0.357	0.474
	0.375	0.493
	0.268	0.273
	0.402	0.402
	0.431	0.295
	0.462	0.381
	0.273	0.488
	0.242	0.346
	0.242	0.426
	0.257	0.284
	0.306	0.305
	0.351	0.723
	0.332	0.349
	0.458	0.562
	0.527	0.222
	0.418	0.369
	0.467	0.482
	0.865	0.401
	0.551	0.731
	0.373	0.893
	0.493	0.275
	0.753	0.193
	0.39	0.817
	0.343	0.422
	0.382	0.462
	0.281	0.523
	0.415	0.723
