# Supplementary material for: An intestinally secreted host factor promotes microsporidia invasion of C. elegans
Source: eLife. 2022 Jan 7;11:e72458. doi: 10.7554/eLife.72458 (PMC8806185; doi:10.7554/eLife.72458)
Supplement: Figure 5—figure supplement 1—source data 1. [file elife-72458-fig5-figsupp1-data1.xlsx]

## Sheet: S6a)
Y Axis: % Alive			Figure 5- Figure supplement 1- Source data 1: Susceptibility to P. aeruginosa PA14 appears at L4.
	Hours	N2	aaim-1 (kea28)	aaim-1 (kea22)	pmk-1 (km25)
	8				1
	8				1
	24			1
	24				1
	24				1
	24				1
	24				1
	24				1
	24				1
	24				1
	24				1
	24				1
	24				1
	24				1
	24				1
	24				1
	24				1
	24				1
	24				1
	24				1
	24				1
	24				1
	24				1
	28	1
	28	1
	28		1
	28		1
	28		1
	28		1
	28		1
	28				1
	28				1
	28				1
	28				1
	28				1
	28				1
	28				1
	28				1
	28				1
	28				1
	28				1
	28				1
	28				1
	28				1
	28				1
	28				1
	28				1
	28				1
	28				1
	28				1
	28				1
	28				1
	28				1
	28				1
	28				1
	28				1
	28				1
	28				1
	28				1
	28				1
	28				1
	28				1
	28				1
	28				1
	32	1
	32		1
	32		1
	32		1
	32		1
	32		1
	32		1
	32		1
	32				1
	32				1
	32				1
	32				1
	32				1
	32				1
	32				1
	32				1
	32				1
	48	1
	48	1
	48	1
	48	1
	48	1
	48	1
	48	1
	48	1
	48	1
	48	1
	48	1
	48	1
	48	1
	48	1
	48	1
	48	1
	48	1
	48	1
	48		1
	48		1
	48		1
	48		1
	48		1
	48		1
	48		1
	48		1
	48		1
	48		1
	48		1
	48		1
	48		1
	48		1
	48		1
	48		1
	48		1
	48		1
	48		1
	48		1
	48		1
	48		1
	48		1
	48		1
	48		1
	48		1
	48		1
	48		1
	48		1
	48			1
	48			1
	48			1
	48			1
	48			1
	48			1
	48			1
	48			1
	48			1
	48			1
	48			1
	48			1
	48			1
	48			1
	48			1
	48			1
	48			1
	48			1
	48			1
	48			1
	48			1
	48			1
	48			1
	48			1
	48			1
	48			1
	48			1
	48			1
	48			1
	48			1
	48			1
	48			1
	48			1
	48			1
	48			1
	48			1
	48			1
	48			1
	48			1
	48			1
	48			1
	48				1
	48				1
	48				1
	48				1
	48				1
	48				1
	52	1
	52	1
	52	1
	52	1
	52	1
	52		1
	52		1
	52		1
	52		1
	52		1
	52			1
	52			1
	52			1
	52			1
	52			1
	52			1
	52			1
	52			1
	52			1
	52			1
	52			1
	52			1
	52			1
	52			1
	56	1
	56	1
	56	1
	56	1
	56	1
	56	1
	56	1
	56		1
	56		1
	56			1
	56			1
	56			1
	56			1
	56			1
	56			1
	56			1
	72	1
	72	1
	72	1
	72	1
	72	1
	72	1
	72	1
	72	1
	72	1
	72	1
	72		1
	72			1
	72			1
	72			1
	72			1
	72			1
	72			1
	72			1
	72			1
	72			1
	72			1
	72			1
	96	1
	96	1
	96	1
	96	1
	96	1
	96	1
	96	1
	96	1
	100	1
	100	1
	100	1
	100	1

## Sheet: S6b)
Y axis: % Alive			Figure 5- Figure supplement 1- Source data 1: Susceptibility to P. aeruginosa PA14 appears at L4.
	Hours	N2	aaim-1 (kea28)	aaim-1 (kea22)	pmk-1 (km25)
	24				1
	24				1
	24				1
	24				1
	24				1
	24				1
	24				1
	24				1
	24				1
	24				1
	24				1
	24				1
	24				1
	24				1
	24				1
	24				1
	24				1
	24				1
	24				1
	24				1
	24				1
	24				1
	24				1
	24				1
	24				1
	24				1
	24				1
	24				1
	24				1
	24				1
	24				1
	24				1
	24				1
	24				1
	24				1
	24				1
	24				1
	24				1
	24				1
	24				1
	24				1
	24				1
	24				1
	24				1
	24				1
	24				1
	24				1
	24				1
	24				1
	24				1
	24				1
	24				1
	24				1
	24				1
	24				1
	24				1
	24				1
	28	1
	28		1
	28		1
	28		1
	28		1
	28		1
	28		1
	28			1
	28			1
	28			1
	28			1
	28			1
	28			1
	28			1
	28			1
	28			1
	28			1
	28			1
	28			1
	28			1
	28			1
	28			1
	28			1
	28			1
	28				1
	28				1
	28				0
	28				0
	28				0
	28				0
	28				0
	28				0
	32	1
	32	1
	32	1
	32	1
	32	1
	32	1
	32	1
	32	1
	32	1
	32	1
	32		1
	32		1
	32		1
	32		1
	32		1
	32		1
	32		1
	32		1
	32		1
	32		1
	32		1
	32		1
	32		1
	32			1
	32			1
	32			1
	32			1
	32			1
	32			1
	32			1
	32			1
	32			1
	32			1
	32			1
	32			1
	32			1
	32			1
	32			1
	32			1
	32			1
	32				1
	32				1
	32				1
	32				1
	32				1
	32				1
	32				1
	32				1
	32				1
	32				1
	32				1
	32				1
	32				1
	32				1
	32				1
	32				1
	48	1
	48	1
	48	1
	48	1
	48	1
	48	1
	48	1
	48	1
	48	1
	48	1
	48	1
	48		1
	48		1
	48		1
	48		1
	48		1
	48		1
	48		1
	48		1
	48		1
	48		1
	48		1
	48		1
	48		1
	48		1
	48		1
	48		1
	48		1
	48		1
	48		1
	48		1
	48		1
	48			1
	48			1
	48			1
	48			1
	48			1
	48			1
	48			1
	48			1
	48			1
	48			1
	48			1
	48			1
	48			1
	48			1
	48			1
	48			1
	48			1
	48			1
	48			1
	48			1
	48				1
	48				1
	52	1
	52	1
	52	1
	52	1
	52	1
	52	1
	52			1
	52			1
	52			1
	56		0
	56		0
	56		1
	56		1
	72		1
	76	1
	76	1
	76	1
	96	1
	96	1
	96	1
	96	1
	100	1
	100	1
	100	1
	104	1
	104	1
	104	1
	104	1
	104	1

## Sheet: S6c)
Y Axis: Relative survival			Figure 5- Figure supplement 1- Source data 1: Susceptibility to P. aeruginosa PA14 appears at L4.
		N2	aaim-1 (kea28)	aaim (kea22)	pmk-1 (km25)
		1	0.917	0.69	0.58
		1	0.9	0.75	0.49
		1	0.7	0.74	0.47

## Sheet: S6d)
Y axis: Bacterial burden (% fluoresence)					Figure 5- Figure supplement 1- Source data 1: Susceptibility to P. aeruginosa PA14 appears at L4.
	N2		aaim-1 (kea28)		aaim-1 (kea22)
R1	0.051		10.699		13.372
	0.005		7.71		10.065
	1.398		3.308		21.893
	0.036		6.371		9.202
	3.214		5.297		14.507
	6.551		6.99		8.168
	3.137		2.033		0.312
	3.199		0.934		2.769
	1.881		0.76		8.688
	0.577		16.196		18.778
	14.854		31.229		4.089
	5.566		0.184		8.831
	9.76		0.382		1.158
	1.716		7.511		2.791
	5.471		10.516		2.039
	0.094		11.193		7.144
	2.14		5.914		10.723
	11.514		4.829		4.845
	0.34		8.338		4.802
	5.699		3.561		0.559
	11.519		11.44		0.384
	0.244		15.622		20.261
	1.848		2.806		0.966
	8.558		2.627		3.001
	14.002		0.091		6.625
	9.471		6.266		0.405
	6.124		17.97		1.939
	5.657		1.523		1.528
	11.333		0.581		0.024
	0.419		8.259		0.026
	7.084		6.273		0.154
	0.066		4.11		11.71
	2.533				8.984
R2	9.631		21.625		7.907
	16.878		19.438		21.822
	26.963		2.91		17.139
	19.287		3.278		2.038
	23.835		18.864		6.102
	16.95		2.592		3.735
	19.263		4.457		3.142
	10.032		36.845		16.149
	34.098		9.289		13.22
	14.841		4.326		10.936
	9.066		3.116		6.216
	7.363		1.527		21.151
	9.68		5.615		20.206
	15.29		0.951		13.494
	6.663		4.635		15.064
	5.011		5.964		0.242
	4.738		6.184		0.048
	2.402		16.364		0.01
	9.415		9.905		0.592
	18.053		27.364		20.274
	12.54		5.804		11.375
	5.831		22.78		18.805
	19.29		1.248		32.43
	6.005		2.15		23.059
	5.126		2.447		12.569
	5.23		5.717		8.463
	0.616		2.558		21.307
	18.963		12.186		8.791
	0.286		1.883		8.701
	1.185		7.225		28.055
	13.309		0.483		6.318
	14.608				9.614
					9.002
R3	13.013		7.903		0.727
	22.807		8.318
	7.43		16.029		3.849
	2.786		1.083		0.221
	7.406		11.81		5.584
	9.392		11.391		0.813
	11.155		6.93		6.037
	13.034		33.382		18.028
	0.006		10.02		0.252
	0.529		21.129		0.326
	12.666		29.349		14.256
	6.765		3.544		3.854
	0.868		4.643		15.733
	2.713		22.678		5.688
	1.47		3.309		27.618
	0.071		13.962		12.896
	32.634		11.092		14.652
	2.762		7.968		0.379
	5.976		5.45		8.596
	14.106		26.756		12.232
	12.95		24.311		7.32
	2.586		25.152		18.508
	21.306		5.784		0.916
	11.179		21.197		1.014
	11.105		5.928		10.88
	7.48		4.641		25.87
	18.662		13.17		0.04
	2.622		3.349		11.195
	17.465		26.852		28.574
	10.4		13.939		14.953
	0.053		25.733		26.001
			24.404
			10.86
			28.552
			7.172

## Sheet: S6e)
Y axis: Bacterial burden (% fluoresence)				Figure 5- Figure supplement 1- Source data 1: Susceptibility to P. aeruginosa PA14 appears at L4.
	N2	aaim-1 (kea28)	aaim-1 (kea22)
R1	8.162	7.623	24.668
	20.714	31.843	11.647
	14.806	1.96	27.07
	9.35	3.838	16.034
	26.826	49.541	29.041
	19.205	16.237	12.379
	28.971	20.781	24.327
	11.149	29.889	19.511
	7.132	16.655	22.764
	23.408	13.499	16.991
	3.015	16.849	14.471
	6.822	11.078	16.258
	5.967	18.281	13.238
	11.552	6.732	36.796
	9.89	23.016	12.202
	24.29	26.096	2.629
	14.976	17.18	12.77
	11.661	9.572	10.462
	6.76	12.232	14.655
	22.607	9.283	11.474
	7.135	15.701	15.494
	14.196	26.176	13.175
	11.734	9.844	33.696
	34.793	11.522	13.006
	17.056	32.477	12.764
	3.529	10.859	3.563
	7.16	5.814	9.687
	8.884	8.809	34.512
		44.149	33.832
		9.338	24.619
R2	4.263	11.537	6.033
	10.015	24.684	3.458
	2.057	10.915	12.67
	3.403	2.525	14.585
	3.42	3.824	11.68
	13.623	30.813	18.919
	3.504	28.136	20.305
	0.95	15.966	17.663
	3.463	5.812	7.763
	4.047	20.844	16.995
	19.549	25.494	11.82
	35.604	24.164	18.287
	7.05	29.931	15.401
	10.038	25.915	19.875
	11.399	21.558	20.907
	7.932	22.759	10.189
	2.779	12.579	10.824
	11.586	27.589	13.508
	6.61	28.019	12.317
	0.835	20.306	8.151
	14.318	27.96	13.744
	18.657	18.988	12.185
	10.428	5.612	19.344
	12.052	9.827	18.346
	9.811	10.504	7.695
	0.993	14.672	17.783
	25.96	17.609	17.273
	14.854	15.008	7.557
	16.54	11.743	8.711
	3.423	13.73	15.769
	5.844	1.821	8.649
			12.181
			26.57
R3	10.11	40.701	27.084
	9.843	18.794	22.546
	22.202	19.751	15.93
	23.788	21.052	16.557
	10.449	39.201	25.961
	8.387	4.592	29.232
	6.442	12.334	25.658
	9.199	21.576	22.361
	11.695	18.165	13.717
	13.291	14.73	10.641
	13.891	18.532	16.079
	9.455	13.332	11.678
	9.205	14.423	15.487
	23.55	15.683	15.384
	13.602	19.106	17.454
	20.44	34.923	16.557
	12.496	21.431	17.6
	14.15	23.238	8.337
	10.455	8.799	23.703
	25.546	25.272	4.834
	5.84	7.342	3.121
	14.603	27.807	10.305
	4.337	17.121	15.287
	24.691	14.31	25.009
	11.216	19.015	6.027
	15.364	13.528	22.018
	21.048	17.917	7.029
	8.547	14.388	9.756
	6.596	19.948	16.409
	22.756	11.951	16.599
	20.796		6.605
