# Supplementary material for: An intestinally secreted host factor promotes microsporidia invasion of C. elegans
Source: eLife. 2022 Jan 7;11:e72458. doi: 10.7554/eLife.72458 (PMC8806185; doi:10.7554/eLife.72458)
Supplement: Figure 5—figure supplement 2—source data 1. [file elife-72458-fig5-figsupp2-data1.xlsx]

## Sheet: S7a-top
y axis: % alive			Figure 5- Figure supplement 2- Source data 1: A mutation in aaim-1 does not influence C. elegans defense against S. aureus or lifespan.
Hours	N2	aaim-1 (kea28)	aaim-1 (kea22)	pmk-1 (km25)
28				1
30				1
30				1
30				1
31	1
31	1
31		1
31		1
31				1
31				1
31				1
31				1
31				1
31				1
31				1
31				1
31				1
31				1
31				1
31				1
31				1
31				1
31				1
31				1
31				1
31				1
31				1
31				1
31				1
31				1
31				1
31				1
31				1
31				1
31				1
31				1
31				1
31				1
31				1
31				1
48	1
48	1
48	1
48	1
48	1
48	1
48	1
48	1
48	1
48	1
48	1
48		1
48		1
48		1
48		1
48		1
48		1
48		1
48			1
48			1
48			1
48			1
48			1
48			1
48			1
48			1
48			1
48			1
48			1
48				1
48				1
48				1
48				1
48				1
48				1
48				1
48				1
48				1
48				1
48				1
48				1
48				1
48				1
48				1
48				1
48				1
48				1
48				1
48				1
48				1
48				1
48				1
48				1
48				1
48				1
48				1
48				1
48				1
48				1
48				1
48				1
48				1
48				1
48				1
48				1
52	1
52	1
52	1
52		1
52		1
52		1
52			1
52			1
52			1
56	1
56	1
56	1
56		1
56		1
56		1
56			1
56			1
56			1
56			1
56			1
56			1
56			1
56			1
56			1
56			1
56			1
56			1
56				1
56				1
56				1
72	1
72	1
72	1
72	1
72	1
72	1
72	1
72	1
72	1
72	1
72	1
72	1
72	1
72	1
72	1
72	1
72	1
72		1
72		1
72		1
72		1
72		1
72		1
72		1
72		1
72		1
72		1
72		1
72		1
72		1
72		1
72		1
72		1
72		1
72		1
72		1
72			1
72			1
72			1
72			1
72			1
72			1
72			1
72			1
72			1
72			1
72			1
72			1
72			1
72			1
72			1
72			1
72			1
72			1
72			1
72				1
76	1
76	1
76		1
76		1
76		1
76		1
76			1
80	1
80	1
80		1
80		1
80		1
80		1
80			1
80			1
80			1
80			1
80			1
80			1
96	1
96	1
96	1
96	1
96	1
96	1
96	1
96	1
96	1
96	1
96		1
96		1
96		1
96		1
96		1
96		1
96		1
96		1
96		1
96		1
96		1
96		1
96			1
96			1
96			1
96			1
96			1
96			1
96			1
100	1
100			1
104	1
104		1
104		1
120	1
120	1
120	1
120	1
120		1
120		1
120		1
120		1
120		1
120			1
120			1
120			1
120			1
120			1
120			1
120			1

## Sheet: S7a-middle
y axis: % alive			Figure 5- Figure supplement 2- Source data 1: A mutation in aaim-1 does not influence C. elegans defense against S. aureus or lifespan.
Hours	N2	aaim-1 (kea28)	aaim-1 (kea22)	pmk-1 (km25)
24			1
24			1
24			1
24			0
24				1
24				1
24				1
24				1
24				1
24				1
24				1
24				1
24				1
24				1
24				1
24				1
24				1
24				1
24				1
24				1
24				1
24				1
24				1
24				1
24				1
24				1
28		0
28		0
28		0
28		0
28		0
28				1
28				1
28				1
28				1
28				1
28				1
32	1
32				1
32				1
32				1
32				1
32				1
32				1
32				1
32				1
32				1
32				1
32				1
32				1
32				1
32				1
32				1
32				1
32				1
48	1
48	1
48	1
48	1
48	1
48	1
48		1
48		1
48		1
48		1
48		1
48		1
48			1
48			1
48			1
48			1
48				1
48				1
48				1
48				1
48				1
48				1
48				1
48				1
48				1
48				1
48				1
48				1
48				1
48				1
48				1
48				1
48				1
48				1
48				1
48				1
48				1
48				1
48				1
48				1
48				1
48				1
48				1
48				1
48				1
48				1
48				1
48				1
48				1
48				1
48				1
48				1
48				1
48				1
48				1
48				1
48				1
48				1
48				1
48				1
48				1
48				1
48				1
48				1
48				1
48				1
48				1
48				1
52
52				1
52				1
52				1
52	1
52	1
52	1
56	1
56	1
56	1
56	1
56	1
56	1
56		1
56		1
56		1
56			1
56			1
56			1
56			1
56				1
72	1
72	1
72	1
72	1
72	1
72	1
72	1
72	1
72	1
72	1
72	1
72	1
72	1
72	1
72	1
72	1
72	1
72	1
72	1
72		1
72		1
72		1
72		1
72		1
72		1
72			1
72			1
72			1
72			1
72			1
72			1
72			1
72			1
72			1
72			1
80	1
80	1
80	1
80			1
80			1
96	1
96	1
96	1
96	1
96	1
96	1
96	1
96	1
96	1
96	1
96	1	1
96		1
96		1
96		1
96			1
96			1
96			1
96			1
96			1
96			1
96			1
96			1
96			1
100		1
103		1
103		1
103		1
120	1
120		1	1

## Sheet: S7a-bottom
y axis: % alive			Figure 5- Figure supplement 2- Source data 1: A mutation in aaim-1 does not influence C. elegans defense against S. aureus or lifespan.
Hours	N2	aaim-1 (kea28)	aaim-1 (kea22)	pmk-1 (km25)
28				1
28				1
28				1
28				1
28				1
28				1
28				1
32		1
32			1
32			1
32			1
32			1
32			1
32			1
32			1
48	1
48	1
48	1
48		1
48		1
48			1
48			1
48			1
48				1
48				1
48				1
48				1
48				1
48				1
48				1
48				1
48				1
48				1
48				1
48				1
48				1
48				1
48				1
48				1
48				1
48				1
48				1
48				1
48				1
48				1
48				1
48				1
48				1
48				1
48				1
48				1
48				1
48				1
52	1
52		1
52		1
52		1
52		1
52				1
52				1
52				1
56	1
56	1
56	1
56		1
56		1
56		1
56		1
56		1
56			1
56			1
56			1
56				1
72	1
72	1
72	1
72	1
72	1
72	1
72	1
72		1
72		1
72		1
72		1
72		1
72		1
72		1
72		1
72		1
72			1
72			1
72			1
72			1
72			1
72			1
72			1
72			1
72			1
72			1
72			1
72				1
72				1
72				1
72				1
72				1
72				1
77.5	1
77.5	1
77.5	0
77.5		1
77.5		1
77.5		1
77.5		1
77.5			1
77.5			1
77.5			1
96	1
96	1
96	1
96	1
96	1
96	1
96	1
96	1
96	1
96		1
96		1
96		1
96		1
96		1
96		1
96		1
96		1
96		1
96		1
96		1
96			1
96			1
96			1
96			1
96			1
96			1
96			1
96			1
96			1
96			1
96			1
96			1
96			1
96			1
96			1
96			1
96			1
96			1
96			1
100	1
100	0
100			0
104	1
104	1
104	1
104	1
104		1
104		1
104			1
104			1
120
120
120
120		1
120		1
120			1
120			1
120			1

## Sheet: S7b-top
Y axis: % Alive			Figure 5- Figure supplement 2- Source data 1: A mutation in aaim-1 does not influence C. elegans defense against S. aureus or lifespan.
Days	N2	aaim-1 (kea28)	aaim-1 (kea22)
2	0
2	0
2		0
2		0
2			1
2			1
2			1
4	1
4	1
4	1
4	1
4	1
4	1
4	0
4	0
4	0
4	0
4		1
4		0
4		0
4		0
4		0
4		0
4			1
4			1
4			0
4			0
4			0
4			0
4			0
6	1
6	1
6	1
6		1
6			1
6			0
8	1
8	1
8	1
8	1
8	1
8	1
8	1
8	1
8	1
8	1
8	1
8		1
8		1
8		1
8		1
8		1
8		1
8		1
8		0
8		0
8		0
8			1
8			1
8			1
8			1
8			1
8			1
8			1
8			1
8			1
8			1
8			1
8			1
8			1
8			0
8			0
8			0
8			0
8			0
9	1
9	1
9	1
9	1
9	1
9	1
9	1
9	1
9	1
9	0
9		1
9		1
9		1
9		1
9		1
9		1
9		1
9		1
9		1
9		1
9		1
9		0
9			1
9			1
9			1
9			1
9			1
9			1
9			1
9			1
9			1
9			1
9			1
9			1
10	1
10	1
10	1
10	1
10	1
10	1
10	1
10	1
10	1
10	1
10	1
10	1
10	1
10	1
10	1
10	1
10	1
10	1
10	1
10	1
10	1
10	1
10		1
10		1
10		1
10		1
10		1
10		1
10		1
10		1
10		1
10		1
10		1
10		1
10		1
10		1
10		1
10			1
10			1
10			1
10			1
10			1
10			1
10			1
10			1
10			1
10			1
10			1
10			1
10			1
10			1
10			0
11	1
11	1
11	1
11	1
11	1
11	1
11	1
11	1
11	1
11	1
11	1
11		1
11		1
11		1
11		1
11		1
11		1
11		1
11		1
11		1
11		1
11		1
11		1
11		1
11			1
11			1
11			1
11			1
11			1
11			1
11			0
11			0
12	1
12	1
12	1
12	1
12	1
12	1
12	1
12		1
12		1
12		1
12		1
12		1
12		1
12		1
12		1
12		1
12		1
12		1
12		1
12		0
12			1
12			1
12			1
12			1
12			1
12			1
12			1
12			1
12			0
13	1
13	1
13	1
13	1
13		1
13		1
13		1
13		1
13			1
13			1
13			1
13			1
13			1
13			1
13			1
13			1
14	1
14	1
14	1
14		1
14		1
14		1
14		1
14			1
14			1
14			1
15	1
15	1
15	1
15	1
15	1
15	1
15	1
15	1
15	1
15	1
15	1
15	1
15	1
15		1
15		1
15		1
15		1
15		1
15		1
15		1
15		1
15		1
15		1
15			1
15			1
15			1
15			1
15			1
15			1
15			1
15			1
15			1
15			1
16	1
16	1
16	1
16	1
16	1
16		1
16		1
16		1
16			1
16			1
16			1
16			1
16			1
16			1
16			1
16			0
16
16
17	1
17	1
17	1
17		1
17		1
17		1
17		1
17		1
17		1
17		1
17		1
17			1
17			1
18	1
18	1
18	1
18	1
18	1
18			1
18			1
18			1
18			1
19	1
19	1
19		1
19		0
19			1
19			1
19			1
19			1
20	1
20	1
20	1
20		1
20		1
20			1
20			1
20			1
20			1
21	1
21	1
21	1
21		1
21		1
22	1
22		1
24		1
24		1
24		1
24			1
25		1

## Sheet: S7b-middle 
Y axis: % Alive			Figure 5- Figure supplement 2- Source data 1: A mutation in aaim-1 does not influence C. elegans defense against S. aureus or lifespan.
Days	N2	aaim-1 (kea28)	aaim-1 (kea22)
2	1
2	1
2	0
2	0
2		0
2		0
2		0
2			1
2			0
2			0
2			0
2			0
2			0
2			0
4	0
4	0
4	0
4		0
4		0
4		0
4			1
4			1
4			0
4			0
4			0
4			0
4			0
4			0
4			0
4			0
4			0
6	0
6	0
6	0
6			0
8	1
8	1
8	1
8	1
8	0
8	0
8	0
8	0
8	0
8	0
8		1
8		1
8		1
8		1
8		1
8		1
8		0
8			1
8			1
8			1
8			1
8			1
8			1
8			1
8			1
8			1
8			1
8			1
8			0
8			0
8			0
8			0
9	1
9	1
9	1
9	1
9	1
9	1
9	1
9	1
9	1
9	1
9	1
9	1
9	1
9	0
9		1
9		1
9		1
9		1
9		1
9		1
9		1
9		1
9		1
9		1
9		1
9		1
9		1
9		1
9			1
9			1
9			1
9			1
9			1
9			1
9			1
9			1
10	1
10	1
10	1
10	1
10	1
10	1
10	1
10	1
10	1
10	1
10	1
10	1
10	1
10	1
10	1
10	1
10	1
10	0
10		1
10		1
10		1
10		1
10		1
10		1
10		1
10		1
10		1
10		1
10		1
10			1
10			1
10			1
10			1
10			1
10			1
10			1
10			1
11	1
11	1
11	1
11	1
11	1
11	1
11	1
11	1
11	1
11	0
11		1
11		1
11		1
11		1
11		1
11		1
11		1
11			1
11			1
11			1
11			1
11			1
11			1
11			1
11			1
11			1
11			1
11			0
11			0
12	1
12	1
12	1
12	1
12	1
12	1
12		1
12			1
13	1
13	1
13	1
13	1
13		1
13		1
13		1
13		1
13		1
13		1
13			1
13			1
13			1
13			1
13			1
13			1
13			1
14	1
14	1
14		1
14		1
14		1
14		1
14		1
14		1
14		1
14			1
14			1
15	1
15	1
15	0
15		1
15		1
15		1
15		1
15		1
15		1
15		1
15			1
15			1
15			1
15			1
15			1
16	1
16	1
16	1
16		1
16		1
16		1
16		1
16		1
16			1
16			1
17	1
17	1
17	1
17	1
17	1
17	1
17	1
17	1
17		1
17		1
17		1
17		1
17		1
17		1
17		1
17		1
17		1
17		1
17		1
17		1
17		1
17			1
17			1
17			1
17			1
17			1
18	1
18	1
18	1
18	1
18	1
18	0
18		1
18		1
18		1
18		1
18			1
18			1
18			1
18			1
18			1
19	1
19	1
19	1
19	1
19	1
19	1
19	1
19	1
19	1
19		1
19		1
19		1
19		1
19			1
19			1
19			1
19			1
19			1
19			0
20	1
20	1
20		1
20		1
20		1
20			1
21	1
21	1
21	1
21	1
21		1
21		1
21		1
21		1
21		1
21		1
21		1
21			1
21			1
21			1
21			1
21			1
22	1
22	1
22		1
22		1
22		1
22		1
22			1
22			1
22			1
23	1
23	1
23		1
23		1
23		1
23			1
24	1
24	1
24		1
24		1
24			1
25			1
25			1
26	1
26		1
26		1
26		1
26		1
26		1
26			1
26			1
26			1
28		1
28			1

## Sheet: S7b-bottom
Y axis: % Alive			Figure 5- Figure supplement 2- Source data 1: A mutation in aaim-1 does not influence C. elegans defense against S. aureus or lifespan.
Days	N2	aaim-1 (kea28)	aaim-1 (kea22)
2	0
2	0
2		0
2		0
2			1
2			1
2			1
4	1
4	1
4	1
4	1
4	1
4	1
4	0
4	0
4	0
4	0
4		1
4		0
4		0
4		0
4		0
4		0
4			1
4			1
4			0
4			0
4			0
4			0
4			0
6	1
6	1
6	1
6		1
6			1
6			0
8	1
8	1
8	1
8	1
8	1
8	1
8	1
8	1
8	1
8	1
8	1
8		1
8		1
8		1
8		1
8		1
8		1
8		1
8		0
8		0
8		0
8			1
8			1
8			1
8			1
8			1
8			1
8			1
8			1
8			1
8			1
8			1
8			1
8			1
8			0
8			0
8			0
8			0
8			0
9	1
9	1
9	1
9	1
9	1
9	1
9	1
9	1
9	1
9	0
9		1
9		1
9		1
9		1
9		1
9		1
9		1
9		1
9		1
9		1
9		1
9		0
9			1
9			1
9			1
9			1
9			1
9			1
9			1
9			1
9			1
9			1
9			1
9			1
10	1
10	1
10	1
10	1
10	1
10	1
10	1
10	1
10	1
10	1
10	1
10	1
10	1
10	1
10	1
10	1
10	1
10	1
10	1
10	1
10	1
10	1
10		1
10		1
10		1
10		1
10		1
10		1
10		1
10		1
10		1
10		1
10		1
10		1
10		1
10		1
10		1
10			1
10			1
10			1
10			1
10			1
10			1
10			1
10			1
10			1
10			1
10			1
10			1
10			1
10			1
10			0
11	1
11	1
11	1
11	1
11	1
11	1
11	1
11	1
11	1
11	1
11	1
11		1
11		1
11		1
11		1
11		1
11		1
11		1
11		1
11		1
11		1
11		1
11		1
11		1
11			1
11			1
11			1
11			1
11			1
11			1
11			0
11			0
12	1
12	1
12	1
12	1
12	1
12	1
12	1
12		1
12		1
12		1
12		1
12		1
12		1
12		1
12		1
12		1
12		1
12		1
12		1
12		0
12			1
12			1
12			1
12			1
12			1
12			1
12			1
12			1
12			0
13	1
13	1
13	1
13	1
13		1
13		1
13		1
13		1
13			1
13			1
13			1
13			1
13			1
13			1
13			1
13			1
14	1
14	1
14	1
14		1
14		1
14		1
14		1
14			1
14			1
14			1
15	1
15	1
15	1
15	1
15	1
15	1
15	1
15	1
15	1
15	1
15	1
15	1
15	1
15		1
15		1
15		1
15		1
15		1
15		1
15		1
15		1
15		1
15		1
15			1
15			1
15			1
15			1
15			1
15			1
15			1
15			1
15			1
15			1
16	1
16	1
16	1
16	1
16	1
16		1
16		1
16		1
16			1
16			1
16			1
16			1
16			1
16			1
16			1
16			0
16
16
17	1
17	1
17	1
17		1
17		1
17		1
17		1
17		1
17		1
17		1
17		1
17			1
17			1
18	1
18	1
18	1
18	1
18	1
18			1
18			1
18			1
18			1
19	1
19	1
19		1
19		0
19			1
19			1
19			1
19			1
20	1
20	1
20	1
20		1
20		1
20			1
20			1
20			1
20			1
21	1
21	1
21	1
21		1
21		1
22	1
22		1
24		1
24		1
24		1
24			1
25		1
