# Supplementary material for: An intestinally secreted host factor promotes microsporidia invasion of C. elegans
Source: eLife. 2022 Jan 7;11:e72458. doi: 10.7554/eLife.72458 (PMC8806185; doi:10.7554/eLife.72458)
Supplement: Figure 5—source data 1. [file elife-72458-fig5-data1.xlsx]

## Sheet: 5a)
Y axis: % GFP
	From L1			From L4			Figure 5: aaim-1 is upregulated by N. parisii and P. auerginosa and aaim-1 animals are susceptible to infection by P. aeruginosa.
	OP50	N. parisii	PA14	N. parisii	PA14
R1	1.836	26.023	24.812	10.74	10.066
	12.179	18.022	12.119	8.142	9.883
	2.224	13.641	17.334	15.553	12.319
	5.983	56.949	7.141	19.636	4.788
	4.049	15.101	21.834	19.598	3.885
	33.833	5.261	21.706	5.371	14.638
	6.263	13.257	10.622	5.239	7.393
	7.352	25.912	25.953	4.301	4.585
	8.575	5.699	33.991	12.257	8.976
	7.193	26.259	19.848	8.612	7.026
	4.502	5.913	35.75	7.834	9.529
	8.706	36.951	30.461	13.538	9.085
	5.796	32.541	26.512	7.079	9.933
	7.895	28.144	32.254	6.972	5.701
	5.201	22.849	11.452	9.271	12.315
	5.826	3.78	6.234	5.478	7.691
	3.375	20.703	19.748	17.129	6.975
	0.772	15.638	37.733	18.3	14.334
	5.995		24.962	15.652	23.187
	9.074		19.18	12.728	15.257
	6.031		14.255	11.873	14.689
	4.223		27.863	11.542	6.174
	4.449		19.5	9.251	11.194
	5.345		24.71	9.228	12.6
	4.64		8.635	5.276	4.541
	4.221		25.562		1.565
	11.415
R2	5.189	28.92	2.215	4.924	13.213
	0.897	7.815	8.178	14.657	3.328
	2.265	15.271	10.992	13.792	6.555
	5.839	10.292	8.147	11.601	8.872
	4.378	21.909	9.889	10.84	6.148
	3.354	5.687	7.568	1.538	5.812
	7.591	17.684	9.19	6.94	4.138
	6.208	29.94	5.163	3.246	2.234
	7.162	16.211	10.519	7.855	3.839
	12.526	5.918	1.914	20.509	6.151
	14.395	48.222	6.82	9.09	3.489
	3.622	25.955	6.984	7.148	4.744
	4.463	28.098	5.652	5.708	6.18
	19.326	37.866	4.554	9.143	17.403
	4.031	12.481	7.697	5.49	9.862
	3.915	36.464	1.803	3.606	5.825
	1.384	23.151	0.97	2.507	3.708
	3.37	20.488	20.987	17.166	8.225
	4.756	15.553	17.608	12.415	8.857
	4.545	35.911	21.775	4.425	18.04
	3.464	24.645	11.88	14.714	9.836
	5.134	25.818	12.028	22.329	8.439
	9.137	23.323	2.945	11.276	18.434
	5.947	15.267	3.819	4.811	7.893
	3.575	17.913	10.832	13.494	14.082
	5.709	27.482	0.64	8.63	7.056
	4.153	17.197	5.632
	7.836
R3	2.681	21.514	9.873	7.072	6.889
	2.813	21.611	12.558	5.71	3.131
	3.013	13.667	10.003	5.295	5.681
	4.411	17.802	15.615	4.927	5.932
	0.541	22.463	15.091	21.163	16.118
	12.492	18.746	23.981	4.161	4.109
	2.384	53.348	15.222	14.765	8.464
	3.24	52.002	18.059	12.729	15.486
	3.432	10.571	24.862	5.224	6.846
	13.016	31.455	33.872	4.524	12.747
	5.944	23.477	22.026	4.358	2.954
	3.953	31.119	31.824	2.163	4.303
	4.918	30.002	15.254	11.829	12.103
	3.398	33.337	14.238	22.141	11.91
	9.461	18.458	14.138	4.063	15.338
	5.737	39.46	18.261	4.308	4.35
	3.743	41.743	15.07	7.397	14.293
	6.333	40.649	3.286	7.114	3.148
	9.242	39.595	8.096	19.021	10.349
	7.042	58.394	4.866	1.324	3.006
	4.237	37.279	17.368	8.349	5.365
	3.538	48.833	23.457	8.353	11.353
	7.315	29.51	12.442	4.777
		17.844		5.475
		54.283		0.771
				2.676

## Sheet: 5b)
Y axis: % Alive
					Figure 5: aaim-1 is upregulated by N. parisii and P. auerginosa and aaim-1 animals are susceptible to infection by P. aeruginosa.
	Hours	N2	aaim-1 (kea28)	aaim-1 (kea22)	pmk-1 (km25)
	24				1
	24				1
	24				1
	24				1
	24				1
	24				1
	24				1
	24				1
	24				1
	24				1
	24				1
	24				1
	28		1
	28				1
	28				1
	28				1
	28				1
	28				1
	28				1
	28				1
	28				1
	28				1
	31	1
	31		1
	31		1
	31		1
	31		1
	31		1
	31			1
	31			1
	31			1
	31			1
	31			1
	31				1
	31				1
	31				1
	31				1
	31				1
	31				1
	31				1
	31				1
	31				1
	31				1
	31				1
	31				1
	31				1
	31				1
	31				1
	31				1
	31				1
	31				1
	31				1
	31				1
	31				1
	48	1
	48	1
	48	1
	48	1
	48	1
	48	1
	48	1
	48	1
	48	1
	48	1
	48	1
	48	1
	48	1
	48	1
	48	1
	48	1
	48
	48
	48
	48
	48
	48		1
	48		1
	48		1
	48		1
	48		1
	48		1
	48		1
	48		1
	48		1
	48		1
	48		1
	48		1
	48		1
	48		1
	48		1
	48		1
	48		1
	48		1
	48		1
	48		1
	48		1
	48		1
	48		1
	48		1
	48		1
	48		1
	48		1
	48		1
	48		1
	48		1
	48		1
	48			1
	48			1
	48			1
	48			1
	48			1
	48			1
	48			1
	48			1
	48			1
	48			1
	48			1
	48			1
	48			1
	48			1
	48			1
	48			1
	48			1
	48			1
	48			1
	48			1
	48			1
	48			1
	48			1
	48			1
	48			1
	48			1
	48			1
	48			1
	48			1
	48			1
	48			1
	48			1
	48			1
	48			1
	48			1
	48			1
	48			1
	48			1
	48				1
	48				1
	48				1
	48				1
	48				1
	48				1
	48				1
	48
	52	1
	52	1
	52	1
	52	1
	52	1
	52		1
	52		1
	52		1
	52			1
	52			1
	52			1
	52			1
	52			1
	52			1
	52			1
	52			1
	56	1
	56	1
	56	1
	56	1
	56	1
	56			1
	56			1
	56			1
	56			1
	56			1
	72	1
	72	1
	72	1
	72	1
	72		1
	72			1
	72			1
	72			1
	72			1
	72			1
	72			1
	72			1
	72			1
	80	1
	80	1
	96	1
	100	1
	104	1
	108	1

## Sheet: 5c)
Y axis: Bacterial Burden (% fluoresence)
					Figure 5: aaim-1 is upregulated by N. parisii and P. auerginosa and aaim-1 animals are susceptible to infection by P. aeruginosa.
	N2	aaim-1 (kea28)	aaim-1 (kea22)
R1	39.131	19.921	39.964
	39.562	48.601	38.121
	33.339	43.99	41.888
	50.658	49.976	48.288
	23.215	18.952	39.144
	46.308	37.39	42.327
	22.307	55.952	40.649
	9.784	40.684	24.265
	34.564	31.759	31.659
	27.422	40.906	39.338
	33.915	32.811	43.903
	35.366	37.789	37.523
	37.449	33.368	37.909
	36.324	37.662	31.055
	23.154	53.302	43.18
	24.179	50.572	36.954
	38.034	50.794	45.767
	36.301	40.424	27.13
	12.699	43.367	41.772
	36.387	49.743	40.861
	27.973	34.167	28.298
	28.45	46.022	55.428
	34.088	46.638
	31.816	39.708
			32.379
R2	18.651	16.368	44.266
	3.542	37.35	47.939
	19.93	23.45	39.652
	1.701	53.579	21.041
	39.902	43.506	43.599
	30.344	23.037	9.471
	22.093	33.572	44.866
	30.457	50.021	48.403
	47.861	36.802	42.807
	39.625	41.225	28.391
	36.03	39.027	42.018
	19.316	51.017	42.187
	37.81	28.049	33.584
	26.242	62.92	38.342
	39.431	39.808	45.854
	46.264	37.915	36.578
	7.687	22.912	12.689
	15.652	56.96	47.114
	43.3	37.609	30.449
	43.047	39.061	48.14
	30.858	58.887	52.988
	36.138	43.863	17.86
	54.028	61.407	41.98
	35.981
	30.765
R3	39.279	34.622	40.603
	30.724	51.903	42.873
	22.908	43.232	29.262
	11.506	45.458	52.105
	10.606	40.773	45.513
	32.113	35.165	28.028
	40.637	29.407	30.446
	39.017	39.507	50.426
	46.613	33.018	19.677
	40.158	23.298	43.299
	17.407	28.29	36.528
	27.721	39.811	29.746
	52.468	30.933	43.6
	41.915	26.631	26.236
	19.167	31.533	26.721
	31.376	38.113	34.456
	29.097	38.355	21.214
	19.954	19.073	32.735
	16.057	3.855	32.571
	27.096	22.939	40.661
	6.505	19.371	36.241
	31.885	26.571	35.616
	35.242	26.287	36.293
	37.444	29.234	34.446
	15.734	30.45	35.826
	25.344	36.082	41.375
	21.647	50.596	40.534
	25.368	49.217	47.384
	10.596		45.997

## Sheet: 5d)
Y axis: Bacterial Burden (% fluoresence)
			Figure 5: aaim-1 is upregulated by N. parisii and P. auerginosa and aaim-1 animals are susceptible to infection by P. aeruginosa.
	N2	aaim-1 (kea22)	aaim-1 (kea22) + paaim-1::aaim-1::3xflag::unc54	aaim-1 (kea22) + pspp-5::aaim-1::3xflag::unc54
R1	16.498	4.141	13.317	0.427
	31.698	7.236	5.07	0.401
	3.8	7.598	0	1.317
	7.854	6.416	3.218	0.184
	6.864	3.377	3.941	1.873
	3.024	11.612	1.546	0.325
	2.5	9.975	0.98	3.648
	5.687	9.902	1.197	0.618
	30.457	5.104	1.082	5.391
	6.941	6.897	0.931	1.293
	7.506	1.456	6.807	5.87
	3.976	0.998	0.408	0.348
	16.659	2.368	1.662	2.463
	6.496	18.008	1.485	0.529
	5.36	5.397	4.497	1.18
	4.896	3.225	0.834	1.563
	9.946	3.811	8.8931	0.447
	2.828	12.525	0.807	0.986
	4.797	27.392	0.707	0.48
	23.862	4.438	0.291	1.522
	5.24	14.6	0.05	1.044
	4.718	6.283	4.777	1.069
	2.222	13.514	7.563	0.481
	2.958	1.972	1.184	1.954
		1.857	0.469	4.434
		13.884	1.554	1.271
		10.75	5.686	3.324
		2.412	2.133
		1.656	0.775
		6.497	2.269
R2	12.663	20.473	2.183	1.589
	16.075	32.692	0.214	2.798
	34.055	12.393	0.997	2.01
	2.732	3.597	10.01	1.026
	10.665	4.503	2.13	3.263
	17.248	5.225	0.367	2.189
	10.538	16.074	0.189	0.968
	23.791	9.024	0.776	0.464
	15.64	11.147	0.322	2.337
	4.876	2.255	4.646	1.207
	13.211	3.851	1.919	2.149
	8.533	4.46	0.315	3.971
	6.844	13.267	1.838	7.684
	28.15	15.192	0.141	4.044
	8.281	9.947	0.256	1.211
	19.145	4.57	2.262	3.576
	8.663	5.088	10.492	1.061
	9.361	2.494	2.474	0.707
	8.354	0.701	5.873	16.441
	10.743	1.688	0.912	0.968
	24.744	6.596	1.282	0.913
	1.685	0.308	2.213	1.465
	22.799	7.365	1.355	16.965
	14.439	8.121	1.182	0.312
	24.189	21.145	0.859	1.622
	17.526	9.734	0.973	2.676
	12.857	8.959	2.428	9.232
	3.64	12.38		2.159
	9.08	1.939
R3	8.111	0.213	1.181	4.936
	6.931	11.477	1.326	4.562
	3.83	12.53	19.289	0.039
	5.82	4.311	6.518	3.662
	1.041	0.062	0	2.618
	4.847	11.101	16.595	6.554
	7.051	0.892	7.684	2.588
	18.36	8.139	10.116	1.574
	8.862	15.043	6.169	3.295
	0.728	7.647	2.989	18.503
	1.907	1.253	0.194	6.661
	17.149	4.936	0.254	1.265
	3.445	3.202	1.217	1.584
	0.546	10.856	8.479	1.669
	14.376	21.729	5.202	4.016
	22.398	0.177	0.383	7.851
	1.303	2.934	0.965	11.764
	0.074	3.686	13.712	0.633
	12.893	4.708	0.114	0.023
	2.299	2.11	0.819	0.222
	8.287	6.016	0.045	2.943
	33.011	9.157	0.037	9.149
	11.105	35.168	2.735	6.975
	5.434	14.605	1.263	17.285
	32.664	0.073	2.184	5.44
	1.818	2.56		0.081
	16.182	7.295		6.229
	2.319	3.708		2.269
		40.987		3.338
				0.887
				1.11

## Sheet: 5e)
Y axis: Bacterial Burden (% fluoresence)
			Figure 5: aaim-1 is upregulated by N. parisii and P. auerginosa and aaim-1 animals are susceptible to infection by P. aeruginosa.
	N2	aaim-1 (kea22)	aaim-1 (kea22) + paaim-1::aaim-1::3xflag::unc54	aaim-1 (kea22) + pspp-5::aaim-1::3xflag::unc54
R1	31.418	20.587	34.145	20.456
	36.303	16.55	22.052	25.966
	34.94	19.718	18.682	3.987
	27.85	21.988	27.529	7.923
	19.091	23.825	10.878	16.525
	34.425	20.298	4.789	6.613
	17.272	18.211	27.87	17.086
	29.461	16.687	8.351	2.967
	28.776	59.026	18.531	5.627
	23.825	29.133	9.335	6.765
	12.725	14.796	27.393	4.758
	26.08	79.761	9.138	8.861
	20.69	73.565	12.899	1.325
	33.855	31.899	7.648	18.075
	30.12	30.08	13.497	2.815
	21.745	22.712	12.419	6.954
	6.705	26.782	23.322	10.212
	5.397	40.627	15.99	10.803
	14.587	44.824	14.092	24.633
	10.738	24.398	12.514	8.376
	19.025	19.575	17.486	5.095
	23.729	17.937	16.297	17.535
	16.056	24.57	17.337	23.43
	12.876	18.028		13.711
	5.887	19.504
	24.017	15.913
	13.288	16.768
	23.498	20.292
	22.453	37.049
		15.342
		29.743
R2	34.731	18.747	4.864	30.675
	26.038	16.634	19.426	7.668
	24.833	28.228	9.715	7.123
	30.36	29.142	3.596	12.429
	13.476	15.037	9.309	21.478
	19.801	11.613	6.502	5.215
	23.585	23.091	6.528	8.937
	18.693	13.541	8.737	22.299
	30.016	29.165	36.38	7.676
	11.055	29.156	5.994	23.174
	30.19	27.398	2.579	11.404
	7.384	13.35	17.387	12.914
	19.496	24.193	11.933	17.323
	16.787	19.329	34.457
	30.749	12.789	8.243
	17.903	20.461	14.951
	26.494	14.302	24.441
	10.266	35.47	19.775
	6.114	12.185	20.245
	7.667	26.34	25.636
	12.357	33.87	17.262
	5.406	35.121	21.803
	7.048	32.51	18.719
	9.862	24.359	12.249
		24.831	7.083
		14.389	9.058
		32.347
		27.58
		21.141
		39.331
R3	26.41	23.22	29.892	0.48
	19.105	12.908	10.643	2.406
	20.357	16.819	5.099	12.002
	7.675	26.525	18.724	16.734
	30.902	19.9	9.877	2.821
	26.561	30.564	7.82	2.819
	13.15	19.33	16.093	20.754
	13.679	19.798	11.078	7.846
	29.6	32.15	20.543	7.421
	24.426	33.974	15.904	1.279
	27.1	26.698	13.986	14.049
	20.369	23.024	13.81	7.176
	11.088	22.807	8.05	9.032
	23.387	36.002	7.375	3.996
	19.091	27.738	0.772	21.788
	25.518	26.808	0.524	9.767
	15.577	47.715	4.46	19.846
	12.834	29.464	3.645	11.97
	21.418	31.118	7.542
	17.48	27.058	4.32
	20.17	18.569	1.678
	32.54	34.779
	18.503	26.344
	22.732	35.649
	13.169	13.106
	5.042
	9.557
	2.78
	11.38
	10.29
