# Supplementary material for: An intestinally secreted host factor promotes microsporidia invasion of C. elegans
Source: eLife. 2022 Jan 7;11:e72458. doi: 10.7554/eLife.72458 (PMC8806185; doi:10.7554/eLife.72458)
Supplement: Figure 6—source data 1. [file elife-72458-fig6-data1.xlsx]

## Sheet: 6a)
Y axis: % strain in population			Figure 6: aaim-1 alleles display enhanced fitness on N. parisii, but reduced fitness on P. aeruginosa.
	OP50				N. parisii				PA14::dsRED
	N2	aaim-1 (kea28)	aaim-1 (kea22)		N2	aaim-1 (kea28)	aaim-1 (kea22)		N2	aaim-1 (kea28)	aaim-1 (kea22)
R1	53	48	49		61	94	94		57	31	36
R2	51	52	51		67	95	92		56	35	34
R3	55	49	49		59	93	93		49	30	30

## Sheet: 6b)
Y axis: % Gravid				Figure 6: aaim-1 alleles display enhanced fitness on N. parisii, but reduced fitness on P. aeruginosa.
	Uninfected			N. parisii			PA14::DsRed			N. parisii + PA14::DsRed
	N2	aaim-1 (kea22)		N2	aaim-1 (kea22)		N2	aaim-1 (kea22)		N2	aaim-1 (kea22)
R1	99	100		0	58		90	96		0	23
R2	100	100		0	62		95	98		0	20
R3	100	100		0	63		98	98		0	18

## Sheet: 6c)
Y Axis: % Pathogen				Figure 6: aaim-1 alleles display enhanced fitness on N. parisii, but reduced fitness on P. aeruginosa.
							Co- infection
	PA14::DsRed			N. parisii			PA14::DsRED	N. parisii		PA14::DsRED	N. parisii
	N2	aaim-1 (kea22)		N2	aaim-1 (kea22)		N2	N2		aaim-1 (kea22)	aaim-1 (kea22)
R1	11.564	26.173		32.266	27.972		1.906	58.271		30.289	47.644
	30.611	18.4		50.614	24.927		0.052	41.502		10.858	27.229
	20.702	30.795		41.826	16.532		0.432	62.512		10.722	22.507
	23.294	13.843		50.587	6.411		0.023	43.877		14.144	34.305
	19.699	12.625		53.095	10.032		18.562	59.982		11.466	17.845
	18.988	40.84		56.948	6.602		0.044	2.361		26.043	0.888
	18.144	22.35		39.138	14.348		4.184	1.631		0.112	1.371
	20.962	41.198		45.517	23.725		4.23	38.617		7.662	15.393
	18.193	26.666		37.642	6.233		4.664	38.885		13.762	23.821
	34.359	12.163		53.634	12.021		0.722	46.047		0.012	28.453
	10.347	23.126		49.402	3.802		0.015	28.852		0.003	38.019
	22.352	13.97		41.614	13.363		12.815	41.74		17.238	28.763
	15.958	17.452		54.765	0.154		7.073	43.739		40.091	24.057
	27.891	11.804		41.014	6.878		3.454	32.402		0.05	42.857
	29.946	31.685		53.997	3.757		8.957	51.654		6.022	32.339
	21.656	20.758		31.95	9.774		0.14	51.803		3.601	12.711
	23.289	25.952		41.097	16.099		8.857	37.686		0.037	49.31
	21.981	20.447		46.066	19.417		1.018	44.038		0.593	38.769
	34.226	30.043		41.956	32.702		1.423	50.171		23.946	29.358
	25.981	18.933		46.291	21.381		0.267	42.948		0.211	27.334
	4.454	23.612		28.121	18.646		22.806	51.138		18.551	24.649
	21.805	29.207		42.687	34.771		0.152	40.498		0.109	17.38
	17.964	20.873		39.895	8.394		38.774	5.659		0.01	41.79
	17.336	24.235		45.407	6.205		12.652	21.673		0.111	12.675
	9.951	16.431		45.407	14.24		4.59	7.353		0.008	44.246
	9.747	25.033		35.77	24.075		1.991	63.425		22.078	18.193
	22.368	19.324		29.78				57.727		15.36	24.685
	27.993	37.5		31.611				43.432		28.254	25.772
	7.915	22.617		36.134				37.123		12.263	33.033
	10.467	23.284		42.617				18.082		0.118	12.89
		14.745
		22.971
R2	2.072	15.791		41.936	1.864		7.52	30.684		11.667	12.536
	19.766	3.272		44.493	18.254		4.109	4.383		0.02	22.015
	0	14.237		16.589	1.82		3.219	31.928		0.528	33.158
	13.425	13.971		28.846	24.287		1.354	42.922		0.234	36.843
	8.916	28.582		51.575	25.093		14.199	11.589		0.386	3.954
	19.078	16.821		38.995	28.878		10.751	18.008		28.611	28.263
	11.792	4.661		4.195	29.036		10.575	26.685		0.444	12.144
	0.399	1.868		50.714	49.825		3.571	28.829		12.381	0
	5.895	28.127		66.965	33.751		9.523	49.251		3.227	0
	0.621	23.196		73.375	12.803		10.324	24.884		3.303	15.486
	7.411	17.838		35.052	37.203		27.607	57.613		1.551	28.247
	24.422	11.435		7.043	20.37		14.916	57.167		18.963	0.01
	10.355	6.555		35.043	26.367		29.422	47.591		16.994	23.716
	10.046	2.796		39.686	36.505		20.887	33.086		0.284	0.093
	2.454	21.624		5.914	0.563		3.625	62.933		13.26	14.751
	2.739	7.165		23.418	17.086			48.851		0.037	22.273
	5.984	6.61		40.786	11.086			58.58		0.35	46.763
	3.488	9.986		28.047	25.946			52.967		14.093	20.209
	4.531	14.054		51.596	0.021			53.439		8.066	54.908
	21.777	28.025		26.673	1.966			47.474		24.867	16.631
	4.845	5.744		26.702	0.765			32.755		1.336	34.535
	0.13	20.362		30.261	20.731			36.812		0	58.155
	7.568	9.256		19.218	9.041			45.891		22.213	55.565
	1.184	17.004		13.987	6.692			40.72		39.432	44.341
	20.588	8.684		18.154	11.188			38.367		1.118	17.062
	1.247	0.697		35.127	7.357			27.337		37.429	53.036
	3.857	7.6		18.824	0.004			57.947		17.357	28.781
	6.407	15.442		35.564	13.598			13.784		6.127	34.188
	10.095	13.613		41.404	14.048			37.703		0.02	1.829
	0.811	5.245		2.574				13.739		0.051	15.559
R3	8.58	9.313		20.802	4.119		23.041	26.989		5.33	24.635
	6.903	19.988		35.342	14.753		3.824	45.348		12.25	15.27
	0.262	27.292		27.103	2.889		16.62	50.907		13.77	21.611
	10.452	10.401		33.719	0.021		21.791	46.876		0.076	30.501
	1.639	9.353		15.05	24.773		18.263	41.327		21.711	41.016
	1.741	1.494		23.708	17.392		22.067	20.233		4.67	43.429
	0.271	6.228		36.661	23.431		0.083	17.839		1.552	45.366
	0	8.883		12.431	28.398		9.315	42.887		13.235	23.57
	1.947	12.354		36.753	35.14		23.562	37.901		0.015	23.029
	8.097	4.442		38.891	15.52		0	10.545		34.348	28.669
	16.248	5.296		15.193	13.009		0.04	14.42		40.332	43.559
	25.203	9.135		34.447	21.562		5.315	34.815		2.326	2.605
	8.295	16.545		17.687	27.729		4.004	41.884		4.347	42.856
	5.511	8.828		38.419	27.037		1.595	45.889		2.413	30.986
	0.753	1.051		54.345	21.015		24.78	55.575		10.942	27.53
	9.227	5.444		24.857	6.608		0	55.575		7.281	22.129
	2.722	7.496		43.598	30.269		1.803	12.532		5.856	50.594
	5.735	2.577		33.665	1.544		0.05	28.871		1.792	8.796
	37.187	15.071		37.831	10.956		8.488	33.235		0.141	33.917
	0.534	31.617		36.507	31.729		0.087	38.941		9.176	21.127
	0.16	4.196		33.32	26.031		31.801	43.82		19.843	21.127
	13.37	14.646		39.424	17.163			29.562		4.887	15.043
	10.333	11.349		43.217	7.34			0.868		28.23	27.714
	1.943	14.061		15.11	0.246			20.554			15.11
	5.591	12.266		29.03	15.066			20.742			15.11
	7.073	9.387		34.022	14.066			35.362			25.98
	0.062	6.58		20.629	1.222			60.397			39.816
	10.203	20.094		24.534	24.714			55.584			29.738
	7.421	9.394		32.66	8.868			50.06			43.309
	0.464	3.917		20.116	8.54			38.792			30.153
