# Supplementary material for: An intestinally secreted host factor promotes microsporidia invasion of C. elegans
Source: eLife journal article supplement (doi:10.7554/elife.72458), 2022-01-07
Supplement: supp [file elife-72458-supp-v1.zip]

T14E8.4 (X-6559570-6562366)

| CHROM | POS     | REF | ALT | AF   | allele | effect                                 | impact   | gene_name | gene_id        | feature_id | transcript_biotype | nt_change            | aa_change   |
|-------|---------|-----|-----|------|--------|----------------------------------------|----------|-----------|----------------|------------|--------------------|----------------------|-------------|
| X     | 6559573 | A   | G   | 0    | G      | synonymous_variant                     | LOW      | T14E8.4   | WBGene00043981 | T14E8.4.1  | protein_coding     | c.1545T>C            | p.Asn515Asn |
| X     | 6560363 | A   | G   | 0    | G      | synonymous_variant                     | LOW      | T14E8.4   | WBGene00043981 | T14E8.4.1  | protein_coding     | c.1284T>C            | p.Ser428Ser |
| X     | 6560426 | A   | G   | 0    | G      | synonymous_variant                     | LOW      | T14E8.4   | WBGene00043981 | T14E8.4.1  | protein_coding     | c.1221T>C            | p.Tyr407Tyr |
| X     | 6560445 | T   | TA  | 0    | TA     | splice_region_variant&intron_variant   | LOW      | T14E8.4   | WBGene00043981 | T14E8.4.1  | protein_coding     | c.1204-3_-1204-2insT | NA          |
| X     | 6560485 | A   | G   | 0.77 | G      | splice_region_variant&intron_variant   | LOW      | T14E8.4   | WBGene00043981 | T14E8.4.1  | protein_coding     | c.1203+7T>C          | NA          |
| X     | 6560524 | C   | G   | 0    | G      | missense_variant                       | MODERATE | T14E8.4   | WBGene00043981 | T14E8.4.1  | protein_coding     | c.1171G>C            | p.Val391Leu |
| X     | 6560647 | C   | A   | 0.02 | A      | missense_variant                       | MODERATE | T14E8.4   | WBGene00043981 | T14E8.4.1  | protein_coding     | c.1048G>T            | p.Ala350Ser |
| X     | 6560670 | A   | G   | 0    | G      | missense_variant&splice_region_variant | MODERATE | T14E8.4   | WBGene00043981 | T14E8.4.1  | protein_coding     | c.1025T>C            | p.Val342Ala |
| X     | 6560810 | T   | A   | 0.01 | A      | missense_variant                       | MODERATE | T14E8.4   | WBGene00043981 | T14E8.4.1  | protein_coding     | c.940A>T             | p.Ile314Phe |
| X     | 6560841 | G   | A   | 0.01 | A      | synonymous_variant                     | LOW      | T14E8.4   | WBGene00043981 | T14E8.4.1  | protein_coding     | c.909C>T             | p.Thr303Thr |
| X     | 6560869 | A   | T   | 0.02 | T      | missense_variant                       | MODERATE | T14E8.4   | WBGene00043981 | T14E8.4.1  | protein_coding     | c.881T>A             | p.Val294Glu |
| X     | 6560873 | C   | T   | 0.01 | T      | missense_variant                       | MODERATE | T14E8.4   | WBGene00043981 | T14E8.4.1  | protein_coding     | c.877G>A             | p.Val293Ile |
| X     | 6560876 | T   | C   | 0    | C      | missense_variant                       | MODERATE | T14E8.4   | WBGene00043981 | T14E8.4.1  | protein_coding     | c.874A>G             | p.Lys292Glu |
| X     | 6560955 | C   | T   | 0    | T      | synonymous_variant                     | LOW      | T14E8.4   | WBGene00043981 | T14E8.4.1  | protein_coding     | c.795G>A             | p.Ser265Ser |
| X     | 6561004 | C   | T   | 0.09 | T      | missense_variant                       | MODERATE | T14E8.4   | WBGene00043981 | T14E8.4.1  | protein_coding     | c.746G>A             | p.Arg249Lys |
| X     | 6561012 | G   | T   | 0.07 | T      | synonymous_variant                     | LOW      | T14E8.4   | WBGene00043981 | T14E8.4.1  | protein_coding     | c.738C>A             | p.Ile246Ile |
| X     | 6561013 | A   | T   | 0.01 | T      | missense_variant                       | MODERATE | T14E8.4   | WBGene00043981 | T14E8.4.1  | protein_coding     | c.737T>A             | p.Ile246Asn |
| X     | 6561030 | C   | T   | 0.54 | T      | synonymous_variant                     | LOW      | T14E8.4   | WBGene00043981 | T14E8.4.1  | protein_coding     | c.720G>A             | p.Thr240Thr |
| X     | 6561062 | C   | T   | 0    | T      | missense_variant                       | MODERATE | T14E8.4   | WBGene00043981 | T14E8.4.1  | protein_coding     | c.688G>A             | p.Ala230Thr |
| X     | 6561122 | T   | A   | 0    | A      | missense_variant                       | MODERATE | T14E8.4   | WBGene00043981 | T14E8.4.1  | protein_coding     | c.628A>T             | p.Ile210Phe |
| X     | 6561199 | G   | T   | 0.03 | T      | missense_variant                       | MODERATE | T14E8.4   | WBGene00043981 | T14E8.4.1  | protein_coding     | c.551C>A             | p.Thr184Asn |
| X     | 6561201 | T   | A   | 0.02 | A      | missense_variant                       | MODERATE | T14E8.4   | WBGene00043981 | T14E8.4.1  | protein_coding     | c.549A>T             | p.Leu183Phe |
| X     | 6561212 | A   | G   | 0    | G      | splice_region_variant&intron_variant   | LOW      | T14E8.4   | WBGene00043981 | T14E8.4.1  | protein_coding     | c.544-6T>C           | NA          |
| X     | 6561830 | G   | A   | 0    | A      | synonymous_variant                     | LOW      | T14E8.4   | WBGene00043981 | T14E8.4.1  | protein_coding     | c.403C>T             | p.Leu135Leu |
| X     | 6562016 | G   | C   | 0.01 | C      | missense_variant                       | MODERATE | T14E8.4   | WBGene00043981 | T14E8.4.1  | protein_coding     | c.217C>G             | p.Gln73Glu  |
| X     | 6562145 | A   | T   | 0    | T      | missense_variant                       | MODERATE | T14E8.4   | WBGene00043981 | T14E8.4.1  | protein_coding     | c.138T>A             | p.Asn46Lys  |
| X     | 6562349 | A   | T   | 0    | T      | missense_variant                       | MODERATE | T14E8.4   | WBGene00043981 | T14E8.4.1  | protein_coding     | c.18T>A              | p.Phe6Leu   |
| X     | 6562355 | T   | A   | 0.05 | A      | missense_variant                       | MODERATE | T14E8.4   | WBGene00043981 | T14E8.4.1  | protein_coding     | c.12A>T              | p.Leu4Phe   |
| X     | 6562361 | C   | G   | 0.01 | G      | missense_variant                       | MODERATE | T14E8.4   | WBGene00043981 | T14E8.4.1  | protein_coding     | c.6G>C               | p.Arg2Ser   |
