# Supplementary material for: An intestinally secreted host factor promotes microsporidia invasion of C. elegans
Source: eLife. 2022 Jan 7;11:e72458. doi: 10.7554/eLife.72458 (PMC8806185; doi:10.7554/eLife.72458)
Supplement: Supplementary file 1. — The different species of microsporidia used in the study, and the varying doses (as defined in figure legends) are listed. Plate concentration refers to the number of spores occupied per cm2 of either 3.5, 6, or 10 cm NGM plates (indicated by *, ** or *** in the ‘total spores on assay plate’ column). The total number of spores present on a single assay plate are listed for the various doses in millions of spores. [file elife-72458-supp1.xlsx]

## Sheet: Table S1 
Species	Dose	Plate concentration (spores/cm2)	Total spores on assay plate (Millions)
			Plate size: *3.5 cm, **6 cm, ***10 cm
	Very low	25984	0.25*
	low	207875	2.0*
	Medium-1	1247232	3.0*
N. parisii	Medium-2	115050	3.25
	Medium-2	41380	3.25**
	Medium-3	141600	4
	High	194700	5.5
	Very high	318600	9
	Maximal	637200	18
N. ausubeli	Medium	103936	1.0*
	High	519680	5.0*
Supplementary file 1: Spore doses utilized in this study.
