# Supplementary figures and images for: An intestinally secreted host factor promotes microsporidia invasion of C. elegans
Source: eLife journal article supplement (doi:10.7554/elife.72458), 2022-01-07

a)

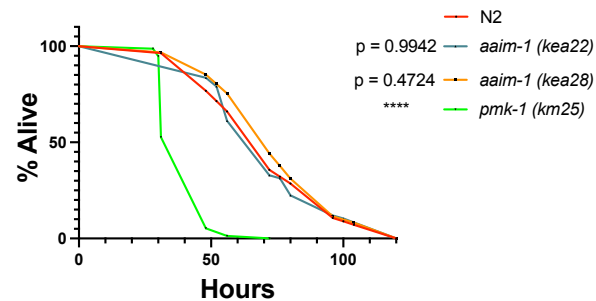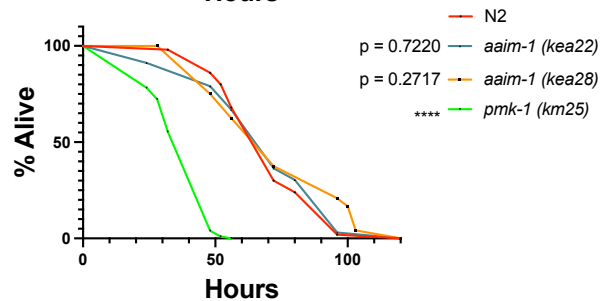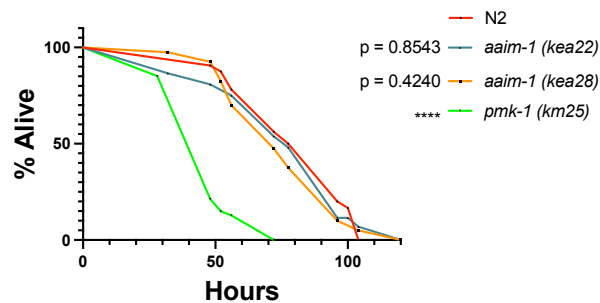

b)

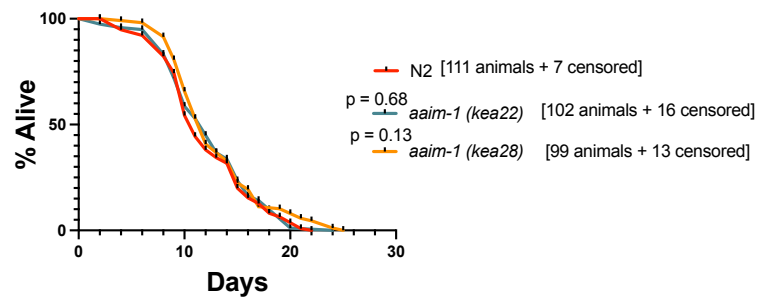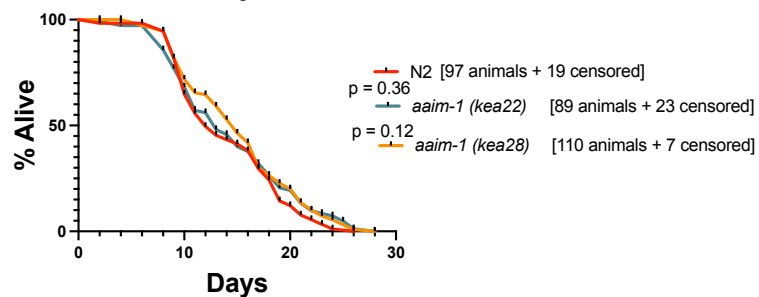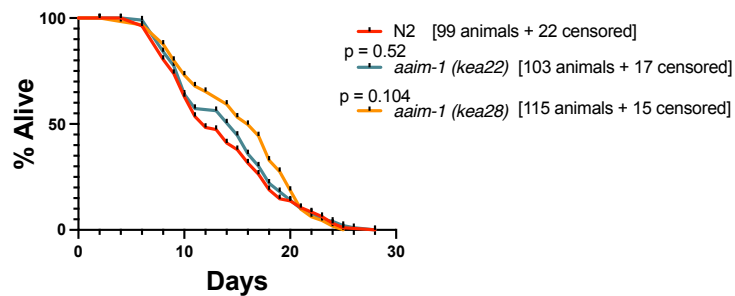

Supplement: supp [file elife-72458-supp-v1.zip]

a)

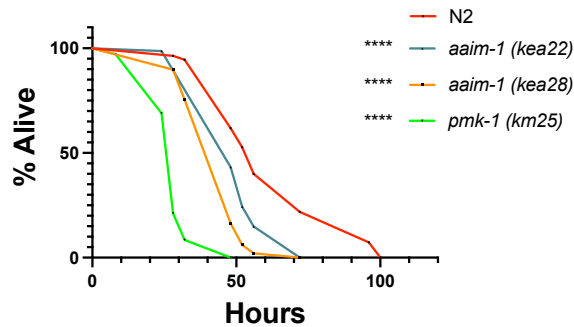

b)

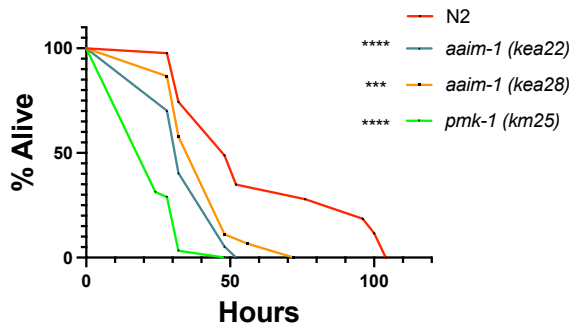

c)

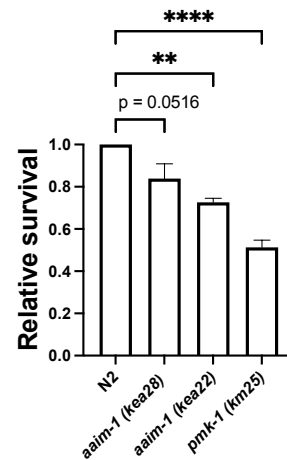

d)

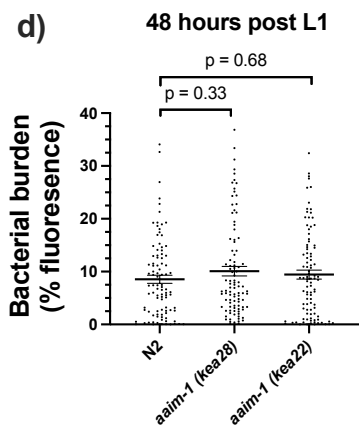

f)

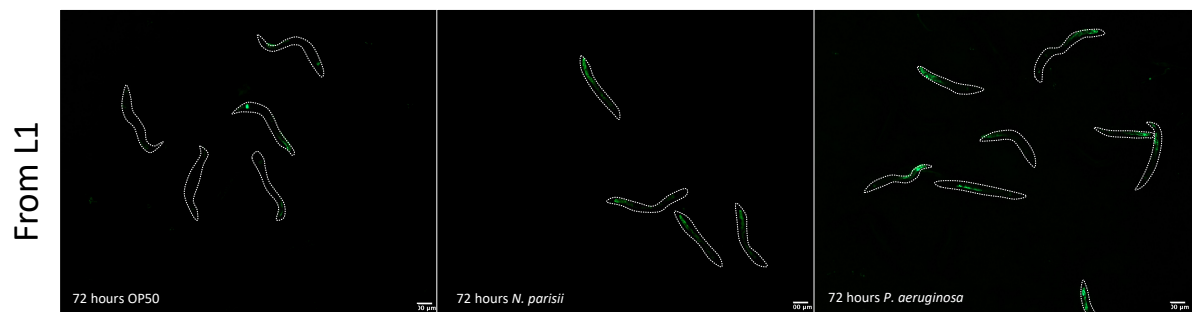

e)

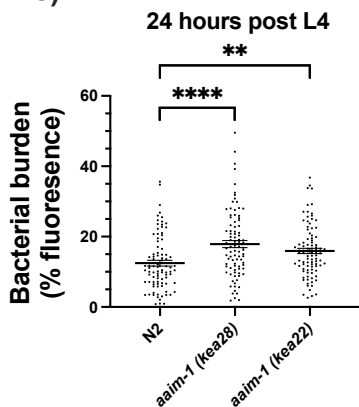

From L4

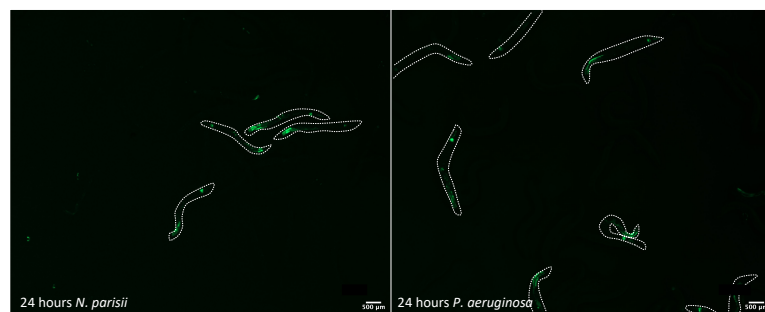

Supplement: supp [file elife-72458-supp-v1.zip]

# L1 initiated infection

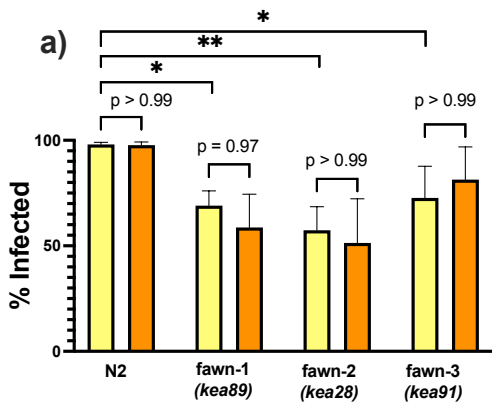

# L3 initiated infection

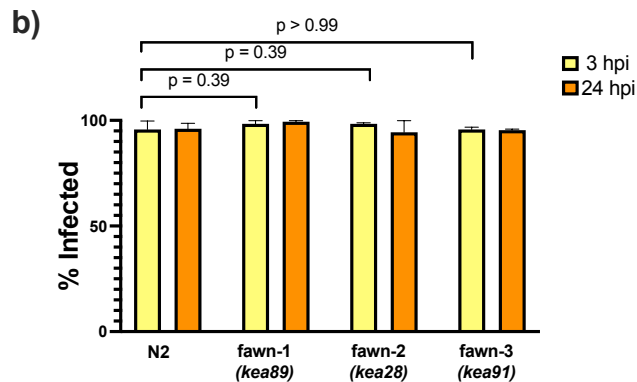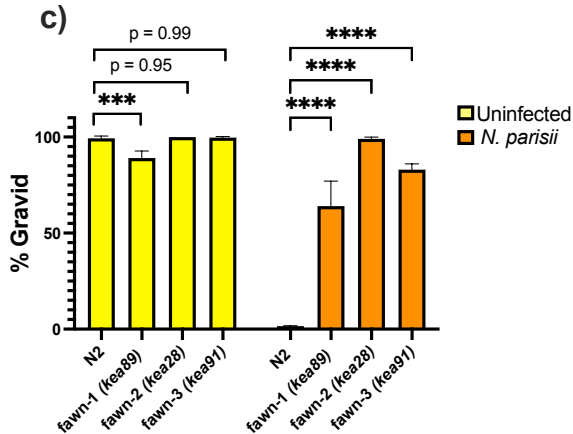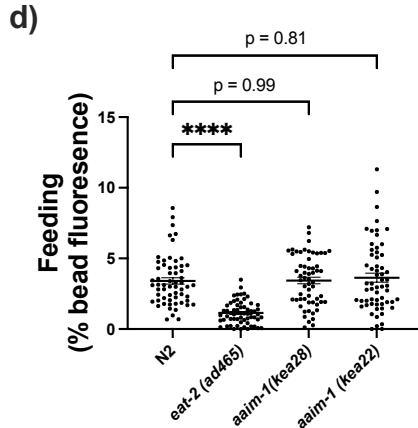

Supplement: supp [file elife-72458-supp-v1.zip]

a)

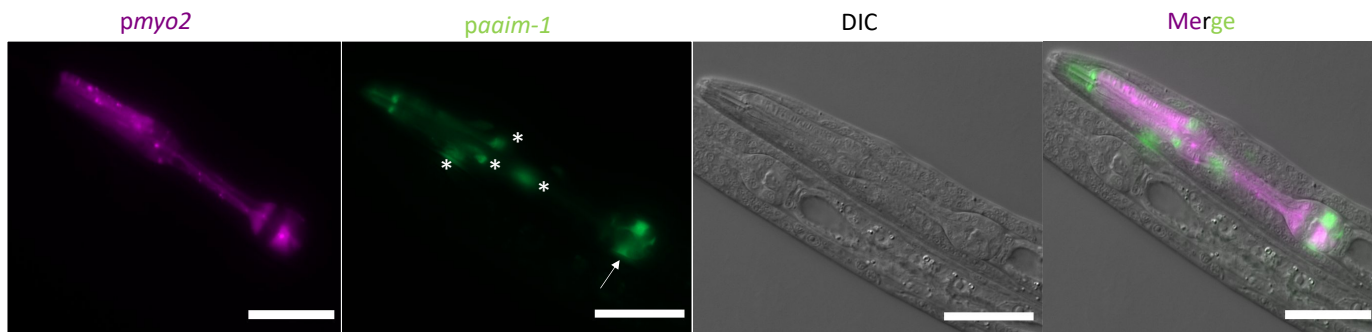

b)

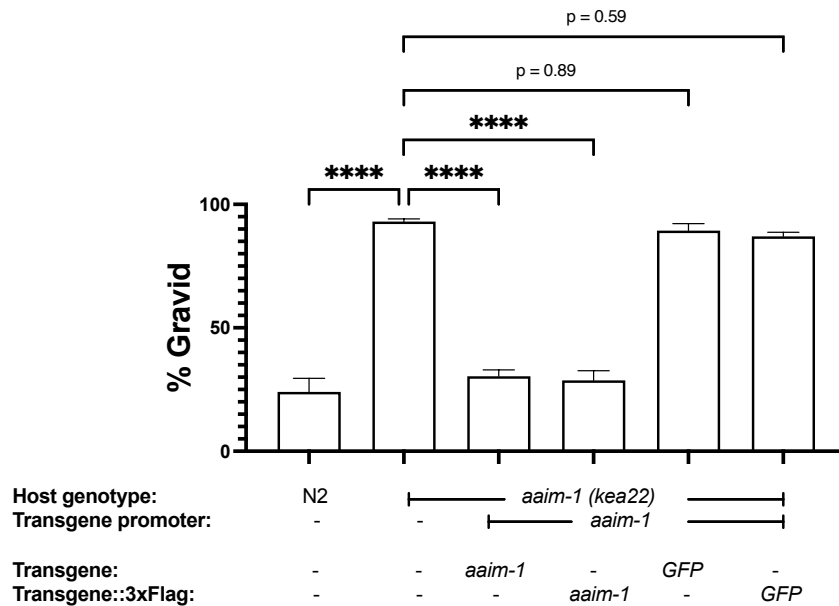

Supplement: supp [file elife-72458-supp-v1.zip]

a)

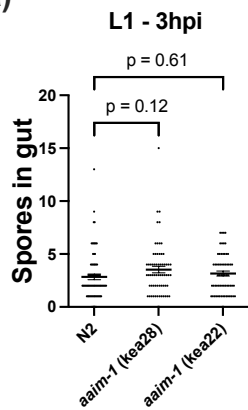

b)

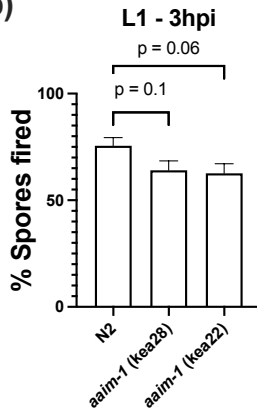

c)

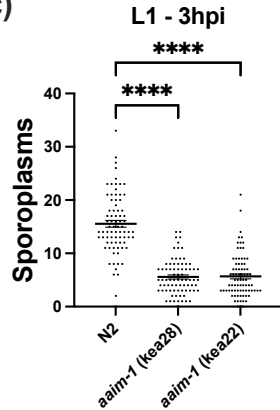

d)

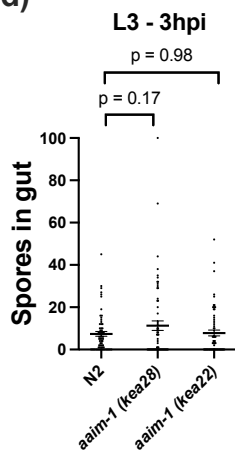

e)

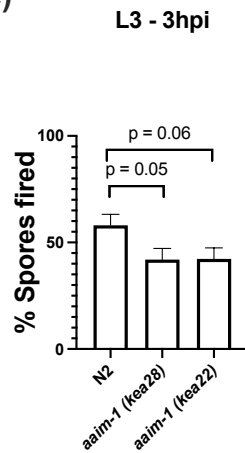

f)

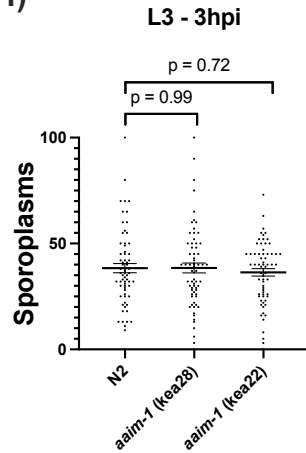

g)

L1

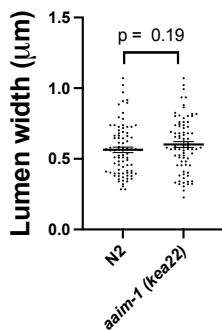

h)

L3

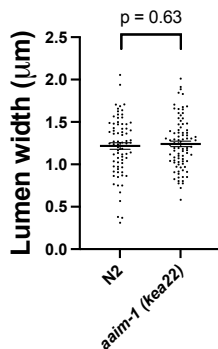

Supplement: supp [file elife-72458-supp-v1.zip]

a)

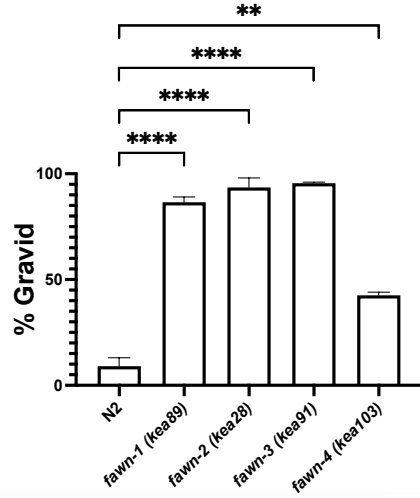

b)

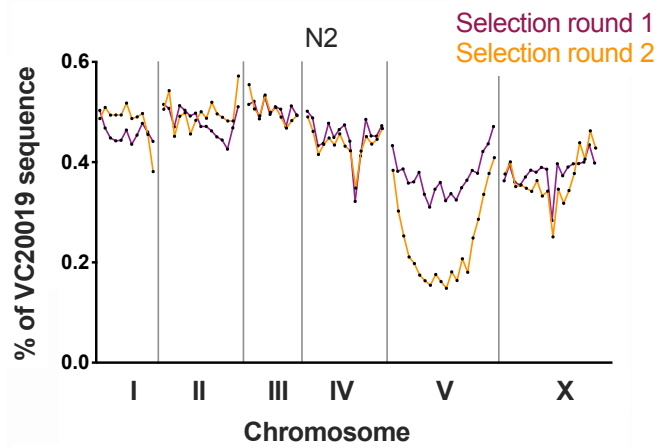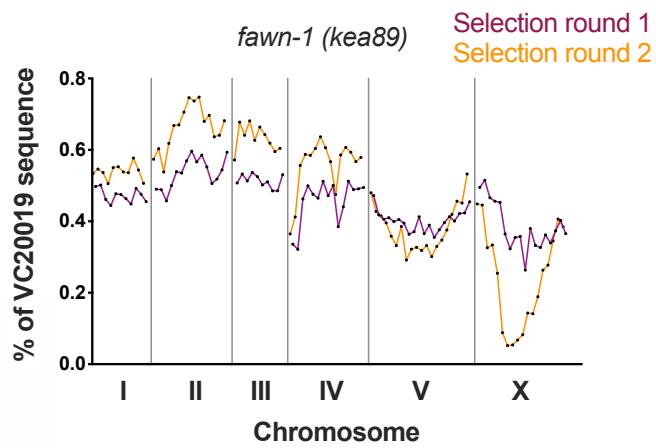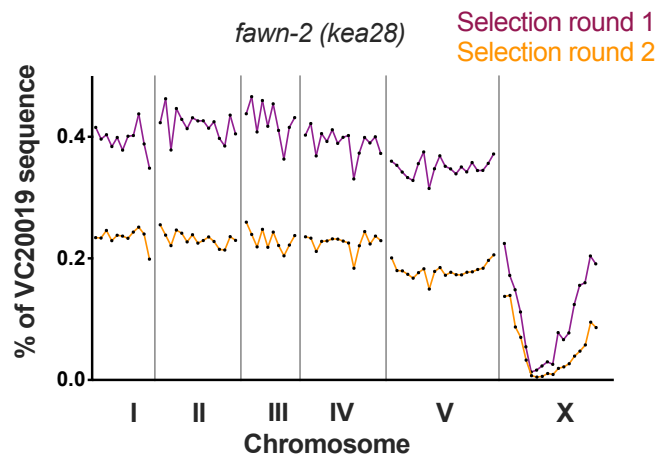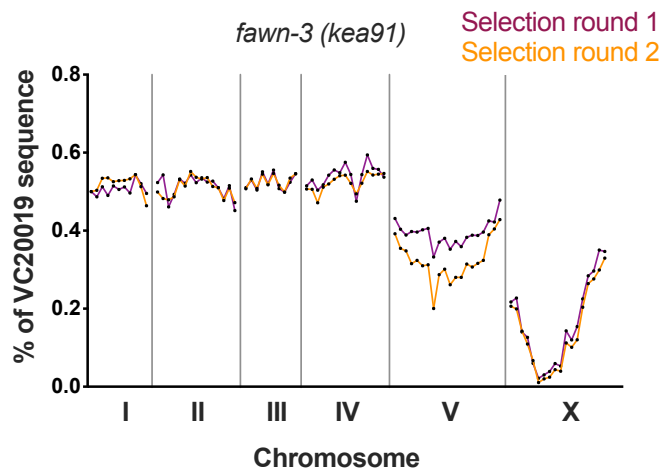

c)

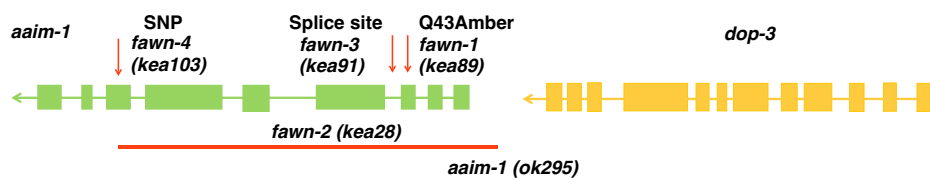

d)

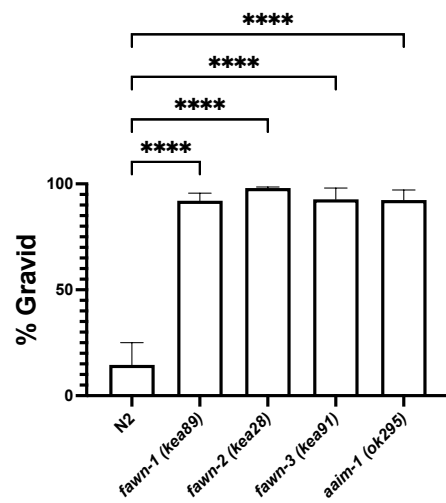

Supplement: supp [file elife-72458-supp-v1.zip]

a)

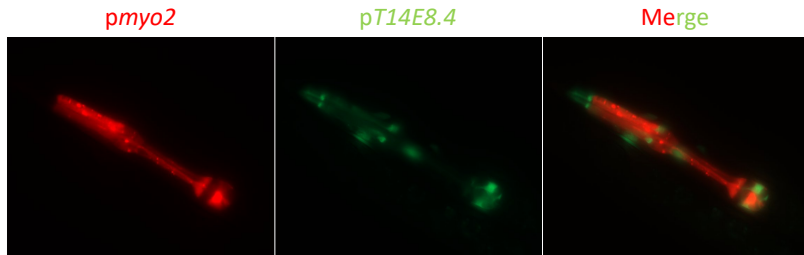

b)

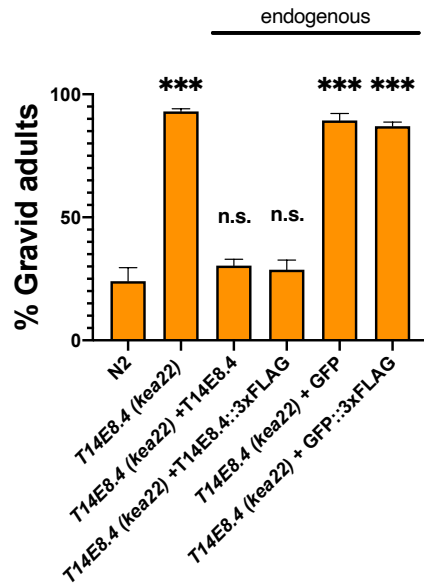

“The presence of a transgene does not influence infection progression”

Supplement: supp [file elife-72458-supp-v1.zip]
